# Supplementary material for: SSM-FastICANet: a hybrid state space and FastICA model for economic growth forecasting in energy-economy-environment systems
Source: PeerJ journal article supplement (doi:10.7717/peerj-cs.3240), 2025-10-03
Supplement: data.xlsx [file data.xlsx]

## Sheet: data set
Country Category	Country	Year	GDP	REC	NREC	CO2
Economies in Transition	Albania	1990	-9.57564	25.5181	74.4819	1.81954
Economies in Transition	Albania	1991	-28.0021	32.9982	67.0018	1.24281
Economies in Transition	Albania	1992	-7.18711	46.8133	53.1867	0.6837
Economies in Transition	Albania	1993	9.55941	51.152	48.848	0.638307
Economies in Transition	Albania	1994	8.30287	51.4595	48.5405	0.645355
Economies in Transition	Albania	1995	13.3223	50.6097	49.3903	0.605436
Economies in Transition	Albania	1996	9.1	51.6364	48.3636	0.612367
Economies in Transition	Albania	1997	-10.92	55.9533	44.0467	0.466921
Economies in Transition	Albania	1998	8.82942	49.9834	50.0166	0.572154
Economies in Transition	Albania	1999	12.8908	42.7183	57.2817	0.955359
Economies in Transition	Albania	2000	6.94622	41.36	58.64	1.02621
Economies in Transition	Albania	2001	8.29331	39.04	60.96	1.0555
Economies in Transition	Albania	2002	4.53652	35.82	64.18	1.23238
Economies in Transition	Albania	2003	5.52864	33.67	66.33	1.33898
Economies in Transition	Albania	2004	5.51467	35.84	64.16	1.40406
Economies in Transition	Albania	2005	5.52642	36.77	63.23	1.33821
Economies in Transition	Albania	2006	5.90266	31.62	68.38	1.34
Economies in Transition	Albania	2007	5.98326	32	68	1.39393
Economies in Transition	Albania	2008	7.50004	35.79	64.21	1.38431
Economies in Transition	Albania	2009	3.35429	37.09	62.91	1.44149
Economies in Transition	Albania	2010	3.70694	36.99	63.01	1.52762
Economies in Transition	Albania	2011	2.54541	35.84	64.16	1.66942
Economies in Transition	Albania	2012	1.41724	39.91	60.09	1.50324
Economies in Transition	Albania	2013	1.00202	41.14	58.86	1.53363
Economies in Transition	Albania	2014	1.77445	38.56	61.44	1.66834
Economies in Transition	Albania	2015	2.21873	38.47	61.53	1.60378
Economies in Transition	Albania	2016	3.31498	39.43	60.57	1.55766
Economies in Transition	Albania	2017	3.80223	37.07	62.93	1.78879
Economies in Transition	Albania	2018	4.01936	38.11	61.89	1.78274
Economies in Transition	Albania	2019	2.08806	40.2	59.8	1.69225
Developing Countries	Algeria	1990	0.800001	0.177228	99.8228	2.44343
Developing Countries	Algeria	1991	-1.2	0.323692	99.6763	2.51624
Developing Countries	Algeria	1992	1.8	0.289771	99.7102	2.47296
Developing Countries	Algeria	1993	-2.1	0.476342	99.5237	2.6133
Developing Countries	Algeria	1994	-0.899997	0.40396	99.596	2.60901
Developing Countries	Algeria	1995	3.79999	0.42248	99.5775	2.65806
Developing Countries	Algeria	1996	4.1	0.389526	99.6105	2.60093
Developing Countries	Algeria	1997	1.1	0.472148	99.5279	2.50244
Developing Countries	Algeria	1998	5.1	0.544071	99.4559	2.47245
Developing Countries	Algeria	1999	3.2	0.510018	99.49	2.53107
Developing Countries	Algeria	2000	3.8	0.43	99.57	2.57874
Developing Countries	Algeria	2001	3	0.43	99.57	2.50067
Developing Countries	Algeria	2002	5.6	0.51	99.49	2.58671
Developing Countries	Algeria	2003	7.2	0.47	99.53	2.73337
Developing Countries	Algeria	2004	4.3	0.44	99.56	2.73735
Developing Countries	Algeria	2005	5.9	0.58	99.42	2.84135
Developing Countries	Algeria	2006	1.7	0.41	99.59	2.96691
Developing Countries	Algeria	2007	3.4	0.41	99.59	3.00729
Developing Countries	Algeria	2008	2.4	0.3	99.7	3.10245
Developing Countries	Algeria	2009	1.6	0.31	99.69	3.17457
Developing Countries	Algeria	2010	3.6	0.26	99.74	3.17365
Developing Countries	Algeria	2011	2.9	0.18	99.82	3.29474
Developing Countries	Algeria	2012	3.4	0.18	99.82	3.60931
Developing Countries	Algeria	2013	2.8	0.13	99.87	3.64498
Developing Countries	Algeria	2014	3.8	0.07	99.93	3.79563
Developing Countries	Algeria	2015	3.7	0.06	99.94	3.9335
Developing Countries	Algeria	2016	3.2	0.08	99.92	3.82009
Developing Countries	Algeria	2017	1.3	0.14	99.86	3.82564
Developing Countries	Algeria	2018	1.1	0.19	99.81	3.92011
Developing Countries	Algeria	2019	1	0.16	99.84	3.97765
Developed Countries	Andorra	1990	3.78139	14.2736	85.7264	7.52183
Developed Countries	Andorra	1991	2.546	14.2736	85.7264	7.23538
Developed Countries	Andorra	1992	0.929214	14.3088	85.6912	6.96308
Developed Countries	Andorra	1993	-1.03148	13.919	86.081	6.72418
Developed Countries	Andorra	1994	2.38318	14.561	85.439	6.54158
Developed Countries	Andorra	1995	2.7575	14.481	85.519	6.73348
Developed Countries	Andorra	1996	4.64974	14.1	85.9	6.99159
Developed Countries	Andorra	1997	9.06767	14.194	85.806	7.30744
Developed Countries	Andorra	1998	3.19479	14.4586	85.5414	7.63954
Developed Countries	Andorra	1999	4.09908	14.5499	85.4501	7.92319
Developed Countries	Andorra	2000	3.52836	14.51	85.49	7.95229
Developed Countries	Andorra	2001	8.11936	15.39	84.61	7.72155
Developed Countries	Andorra	2002	4.54636	15.83	84.17	7.56624
Developed Countries	Andorra	2003	8.6942	16.52	83.48	7.24242
Developed Countries	Andorra	2004	8.13568	16.57	83.43	7.34426
Developed Countries	Andorra	2005	5.3978	16.61	83.39	7.35378
Developed Countries	Andorra	2006	4.80869	17.57	82.43	6.79054
Developed Countries	Andorra	2007	1.55319	16.56	83.44	6.53105
Developed Countries	Andorra	2008	-5.55919	17.02	82.98	6.4393
Developed Countries	Andorra	2009	-5.30285	17.13	82.87	6.15669
Developed Countries	Andorra	2010	-1.97496	18.67	81.33	6.1572
Developed Countries	Andorra	2011	-0.00806975	18.55	81.45	5.85089
Developed Countries	Andorra	2012	-4.97444	18.76	81.24	5.94465
Developed Countries	Andorra	2013	-3.5476	19.14	80.86	5.9428
Developed Countries	Andorra	2014	2.50447	19.45	80.55	5.80713
Developed Countries	Andorra	2015	1.43414	19.32	80.68	6.02618
Developed Countries	Andorra	2016	3.70968	19.32	80.68	6.0806
Developed Countries	Andorra	2017	0.346072	19.15	80.85	6.10413
Developed Countries	Andorra	2018	1.58877	18.58	81.42	6.36298
Developed Countries	Andorra	2019	2.01555	18.4	81.6	6.48122
Least Developed Countries	Angola	1990	-3.4501	72.2553	27.7447	0.553662
Least Developed Countries	Angola	1991	0.991359	71.8886	28.1114	0.544539
Least Developed Countries	Angola	1992	-5.83828	72.7233	27.2767	0.543557
Least Developed Countries	Angola	1993	-23.9834	71.2771	28.7229	0.708984
Least Developed Countries	Angola	1994	1.33936	72.2203	27.7797	0.836804
Least Developed Countries	Angola	1995	15	73.9459	26.0541	0.912141
Least Developed Countries	Angola	1996	13.5444	73.1396	26.8604	1.07217
Least Developed Countries	Angola	1997	7.27428	73.7344	26.2656	1.08664
Least Developed Countries	Angola	1998	4.69115	76.8198	23.1802	1.09183
Least Developed Countries	Angola	1999	2.18149	73.4108	26.5892	1.10986
Least Developed Countries	Angola	2000	3.05462	73.44	26.56	0.988077
Least Developed Countries	Angola	2001	4.206	72.34	27.66	0.941829
Least Developed Countries	Angola	2002	13.6657	70.42	29.58	0.895578
Least Developed Countries	Angola	2003	2.99	65.14	34.86	0.924869
Least Developed Countries	Angola	2004	10.95	61.92	38.08	0.930263
Least Developed Countries	Angola	2005	15.03	68.38	31.62	0.813539
Least Developed Countries	Angola	2006	11.55	62.13	37.87	0.82184
Least Developed Countries	Angola	2007	14.01	58.49	41.51	0.811754
Least Developed Countries	Angola	2008	11.17	54.88	45.12	0.888658
Least Developed Countries	Angola	2009	0.86	52.41	47.59	0.939404
Least Developed Countries	Angola	2010	4.86	52.51	47.49	0.976184
Least Developed Countries	Angola	2011	3.47	51.06	48.94	0.985522
Least Developed Countries	Angola	2012	8.54	49.47	50.53	0.950696
Least Developed Countries	Angola	2013	4.95	47.95	52.05	1.03629
Least Developed Countries	Angola	2014	4.82	48.23	51.77	1.09978
Least Developed Countries	Angola	2015	0.94	47.84	52.16	1.13504
Least Developed Countries	Angola	2016	-2.58	49.03	50.97	1.03181
Least Developed Countries	Angola	2017	-0.15	56.25	43.75	0.813301
Least Developed Countries	Angola	2018	-1.31631	57.36	42.64	0.777675
Least Developed Countries	Angola	2019	-0.7	54.69	45.31	0.792137
Developing Countries	Argentina	1990	-2.46721	8.92291	91.0771	3.07554
Developing Countries	Argentina	1991	9.13311	8.74818	91.2518	3.20203
Developing Countries	Argentina	1992	7.93729	9.47165	90.5284	3.21897
Developing Countries	Argentina	1993	8.20698	10.1283	89.8717	3.2458
Developing Countries	Argentina	1994	5.8362	10.7349	89.2651	3.25295
Developing Countries	Argentina	1995	-2.84521	11.2052	88.7948	3.24134
Developing Countries	Argentina	1996	5.52669	10.1939	89.8061	3.47695
Developing Countries	Argentina	1997	8.11105	10.9991	89.0009	3.53699
Developing Countries	Argentina	1998	3.85018	11.343	88.657	3.67879
Developing Countries	Argentina	1999	-3.38546	10.3062	89.6938	3.68852
Developing Countries	Argentina	2000	-0.788999	9.85	90.15	3.58739
Developing Countries	Argentina	2001	-4.40884	11.51	88.49	3.36037
Developing Countries	Argentina	2002	-10.8945	11.62	88.38	3.11742
Developing Countries	Argentina	2003	8.83704	10.82	89.18	3.35172
Developing Countries	Argentina	2004	9.02957	9.29	90.71	3.67297
Developing Countries	Argentina	2005	8.85166	9.64	90.36	3.75364
Developing Countries	Argentina	2006	8.04715	9.18	90.82	3.94249
Developing Countries	Argentina	2007	9.00765	7.72	92.28	4.10263
Developing Countries	Argentina	2008	4.05723	7.65	92.35	4.17239
Developing Countries	Argentina	2009	-5.91853	8.59	91.41	3.86757
Developing Countries	Argentina	2010	10.1254	8.79	91.21	4.09969
Developing Countries	Argentina	2011	6.00395	8.83	91.17	4.28099
Developing Countries	Argentina	2012	-1.02642	8.61	91.39	4.26422
Developing Countries	Argentina	2013	2.40532	8.91	91.09	4.34212
Developing Countries	Argentina	2014	-2.51262	9.79	90.21	4.2091
Developing Countries	Argentina	2015	2.73116	9.4	90.6	4.30191
Developing Countries	Argentina	2016	-2.08033	9.38	90.62	4.20185
Developing Countries	Argentina	2017	2.8185	10.37	89.63	4.07131
Developing Countries	Argentina	2018	-2.6174	10.52	89.48	3.97577
Developing Countries	Argentina	2019	-2.02593	10.74	89.26	3.74065
Economies in Transition	Armenia	1990	-10	2.11894	97.8811	5.61025
Economies in Transition	Armenia	1991	-11.7	2.30944	97.6906	5.90258
Economies in Transition	Armenia	1992	-41.8	6.67768	93.3223	3.16601
Economies in Transition	Armenia	1993	-8.8	12.9368	87.0632	1.49861
Economies in Transition	Armenia	1994	5.4	17.7637	82.2363	0.834434
Economies in Transition	Armenia	1995	6.9	9.27435	90.7256	1.09096
Economies in Transition	Armenia	1996	5.8654	12.4733	87.5267	0.814339
Economies in Transition	Armenia	1997	3.32108	10.1201	89.8799	1.06604
Economies in Transition	Armenia	1998	7.3	9.38056	90.6194	1.11623
Economies in Transition	Armenia	1999	3.3	8.3588	91.6412	1.00679
Economies in Transition	Armenia	2000	5.9	7.16	92.84	1.15976
Economies in Transition	Armenia	2001	9.6	5.42	94.58	1.18006
Economies in Transition	Armenia	2002	13.2	8.9	91.1	1.02835
Economies in Transition	Armenia	2003	14	9.81	90.19	1.15973
Economies in Transition	Armenia	2004	10.5	8.71	91.29	1.25303
Economies in Transition	Armenia	2005	13.9	6.49	93.51	1.49601
Economies in Transition	Armenia	2006	13.2	7.65	92.35	1.51776
Economies in Transition	Armenia	2007	13.7	7.02	92.98	1.77316
Economies in Transition	Armenia	2008	6.9	6.4	93.6	1.95693
Economies in Transition	Armenia	2009	-14.1	7.8	92.2	1.56158
Economies in Transition	Armenia	2010	2.2	9.36	90.64	1.50835
Economies in Transition	Armenia	2011	4.7	8.01	91.99	1.71734
Economies in Transition	Armenia	2012	7.2	6.56	93.44	1.98319
Economies in Transition	Armenia	2013	3.3	6.77	93.23	1.89813
Economies in Transition	Armenia	2014	3.6	7.08	92.92	1.88161
Economies in Transition	Armenia	2015	3.2	10.74	89.26	1.82529
Economies in Transition	Armenia	2016	0.2	13.15	86.85	1.72675
Economies in Transition	Armenia	2017	7.5	12.56	87.44	1.82356
Economies in Transition	Armenia	2018	5.2	11.13	88.87	1.93445
Economies in Transition	Armenia	2019	7.6	10.34	89.66	2.08606
Developed Countries	Australia	1990	3.57351	8.00958	91.9904	15.4485
Developed Countries	Australia	1991	-0.395087	8.24547	91.7545	15.3182
Developed Countries	Australia	1992	0.41378	7.51647	92.4835	15.3415
Developed Countries	Australia	1993	4.03357	8.61699	91.383	15.4554
Developed Countries	Australia	1994	3.98047	8.25995	91.7401	15.692
Developed Countries	Australia	1995	3.83383	8.21781	91.7822	16.0569
Developed Countries	Australia	1996	3.85442	8.86597	91.134	16.4278
Developed Countries	Australia	1997	3.90829	9.08024	90.9198	16.6253
Developed Countries	Australia	1998	4.61401	8.59507	91.4049	17.5629
Developed Countries	Australia	1999	4.93667	8.50727	91.4927	17.6324
Developed Countries	Australia	2000	3.91243	8.42	91.58	17.7231
Developed Countries	Australia	2001	2.0383	8.37	91.63	17.8046
Developed Countries	Australia	2002	4.01453	8.74	91.26	17.9819
Developed Countries	Australia	2003	3.11033	7.15	92.85	17.7217
Developed Countries	Australia	2004	4.20545	6.68	93.32	18.1747
Developed Countries	Australia	2005	3.16034	6.71	93.29	18.1463
Developed Countries	Australia	2006	2.72689	6.85	93.15	18.1415
Developed Countries	Australia	2007	3.76849	6.95	93.05	18.5211
Developed Countries	Australia	2008	3.57701	6.79	93.21	18.3037
Developed Countries	Australia	2009	1.86683	7.15	92.85	18.2231
Developed Countries	Australia	2010	2.17234	8.16	91.84	17.5901
Developed Countries	Australia	2011	2.46975	8.32	91.68	17.2954
Developed Countries	Australia	2012	3.91736	8.29	91.71	17.022
Developed Countries	Australia	2013	2.60021	9.21	90.79	16.4423
Developed Countries	Australia	2014	2.56293	9.32	90.68	15.8304
Developed Countries	Australia	2015	2.1722	9.31	90.69	15.8633
Developed Countries	Australia	2016	2.74164	9.42	90.58	15.9147
Developed Countries	Australia	2017	2.29593	9.69	90.31	15.8183
Developed Countries	Australia	2018	2.87097	9.67	90.33	15.4935
Developed Countries	Australia	2019	2.11315	10.13	89.87	15.2383
Developed Countries	Austria	1990	4.34564	25.1358	74.8642	7.58936
Developed Countries	Austria	1991	3.44163	24.4958	75.5042	8.04911
Developed Countries	Austria	1992	2.09352	26.1368	73.8632	7.35393
Developed Countries	Austria	1993	0.526809	26.3578	73.6422	7.31124
Developed Countries	Austria	1994	2.40212	25.6795	74.3205	7.34364
Developed Countries	Austria	1995	2.66798	25.6301	74.3699	7.69726
Developed Countries	Austria	1996	2.34953	24.0369	75.9631	8.15427
Developed Countries	Austria	1997	2.0936	24.8711	75.1289	8.0597
Developed Countries	Austria	1998	3.58143	24.4094	75.5906	8.10727
Developed Countries	Austria	1999	3.55633	26.4383	73.5617	7.88882
Developed Countries	Austria	2000	3.37572	26.44	73.56	7.92979
Developed Countries	Austria	2001	1.26717	25.53	74.47	8.44411
Developed Countries	Austria	2002	1.65155	24.68	75.32	8.58332
Developed Countries	Austria	2003	0.941471	22.56	77.44	9.16834
Developed Countries	Austria	2004	2.73512	23.17	76.83	9.27561
Developed Countries	Austria	2005	2.24407	24.41	75.59	9.26611
Developed Countries	Austria	2006	3.45404	26.64	73.36	8.96157
Developed Countries	Austria	2007	3.72742	28.99	71.01	8.5878
Developed Countries	Austria	2008	1.46042	29.68	70.32	8.49967
Developed Countries	Austria	2009	-3.76458	31.31	68.69	7.72114
Developed Countries	Austria	2010	1.83709	31.15	68.85	8.36501
Developed Countries	Austria	2011	2.9228	31.64	68.36	8.13547
Developed Countries	Austria	2012	0.680446	34.38	65.62	7.72361
Developed Countries	Austria	2013	0.0255047	34.59	65.41	7.7537
Developed Countries	Austria	2014	0.661273	35.67	64.33	7.2604
Developed Countries	Austria	2015	1.0145	34.82	65.18	7.31716
Developed Countries	Austria	2016	1.98944	34.64	65.36	7.28882
Developed Countries	Austria	2017	2.25857	33.98	66.02	7.48616
Developed Countries	Austria	2018	2.5016	34.11	65.89	7.13306
Developed Countries	Austria	2019	1.49121	33.77	66.23	7.29398
Economies in Transition	Azerbaijan	1990	-15.58	0.722063	99.2779	7.45345
Economies in Transition	Azerbaijan	1991	-0.7	0.804646	99.1954	7.15966
Economies in Transition	Azerbaijan	1992	-22.6	1.21725	98.7827	8.61685
Economies in Transition	Azerbaijan	1993	-23.1	1.98307	98.0169	6.41111
Economies in Transition	Azerbaijan	1994	-19.7	1.51596	98.484	4.41253
Economies in Transition	Azerbaijan	1995	-11.8	1.36684	98.6332	4.2252
Economies in Transition	Azerbaijan	1996	1.3	1.7389	98.2611	3.50251
Economies in Transition	Azerbaijan	1997	5.8	1.98985	98.0102	3.37958
Economies in Transition	Azerbaijan	1998	10	2.48438	97.5156	3.34766
Economies in Transition	Azerbaijan	1999	7.4	2.14394	97.8561	3.27206
Economies in Transition	Azerbaijan	2000	11.1	2.07	97.93	3.44035
Economies in Transition	Azerbaijan	2001	9.9	1.75	98.25	3.25476
Economies in Transition	Azerbaijan	2002	9.43892	2.35	97.65	3.20364
Economies in Transition	Azerbaijan	2003	10.2083	2.94	97.06	3.46972
Economies in Transition	Azerbaijan	2004	9.2538	3.07	96.93	3.40817
Economies in Transition	Azerbaijan	2005	27.9615	3.36	96.64	3.57966
Economies in Transition	Azerbaijan	2006	34.5	2.86	97.14	3.59359
Economies in Transition	Azerbaijan	2007	25	3.78	96.22	3.21979
Economies in Transition	Azerbaijan	2008	10.759	3.08	96.92	3.47468
Economies in Transition	Azerbaijan	2009	9.29636	3.27	96.73	2.85004
Economies in Transition	Azerbaijan	2010	5.04894	4.45	95.55	2.6849
Economies in Transition	Azerbaijan	2011	0.1	3.55	96.45	2.97392
Economies in Transition	Azerbaijan	2012	2.16524	2.84	97.16	3.2391
Economies in Transition	Azerbaijan	2013	5.8098	2.52	97.48	3.28562
Economies in Transition	Azerbaijan	2014	2.75051	2.12	97.88	3.3812
Economies in Transition	Azerbaijan	2015	1.09398	2.33	97.67	3.29245
Economies in Transition	Azerbaijan	2016	-3.1	1.94	98.06	3.30402
Economies in Transition	Azerbaijan	2017	0.2	1.91	98.09	3.24334
Economies in Transition	Azerbaijan	2018	1.5	1.93	98.07	3.29283
Economies in Transition	Azerbaijan	2019	2.5	1.62	98.38	3.5424
Least Developed Countries	Bangladesh	1990	5.62226	71.665	28.335	0.111658
Least Developed Countries	Bangladesh	1991	3.48523	73.1597	26.8403	0.102558
Least Developed Countries	Bangladesh	1992	5.44269	71.6607	28.3393	0.109461
Least Developed Countries	Bangladesh	1993	4.71156	70.5571	29.4429	0.11391
Least Developed Countries	Bangladesh	1994	3.89013	68.9799	31.0201	0.120102
Least Developed Countries	Bangladesh	1995	5.12128	63.8028	36.1972	0.143701
Least Developed Countries	Bangladesh	1996	4.52292	62.1241	37.8759	0.143052
Least Developed Countries	Bangladesh	1997	4.4899	59.9729	40.0271	0.157872
Least Developed Countries	Bangladesh	1998	5.17703	60.234	39.766	0.156909
Least Developed Countries	Bangladesh	1999	4.67016	60.5344	39.4656	0.160636
Least Developed Countries	Bangladesh	2000	5.29329	59.06	40.94	0.169594
Least Developed Countries	Bangladesh	2001	5.07729	55.82	44.18	0.198172
Least Developed Countries	Bangladesh	2002	3.83312	54.33	45.67	0.207053
Least Developed Countries	Bangladesh	2003	4.73957	52.62	47.38	0.212402
Least Developed Countries	Bangladesh	2004	5.23953	52.05	47.95	0.222869
Least Developed Countries	Bangladesh	2005	6.53594	50.66	49.34	0.235264
Least Developed Countries	Bangladesh	2006	6.6719	48.69	51.31	0.254752
Least Developed Countries	Bangladesh	2007	7.0586	47.19	52.81	0.266297
Least Developed Countries	Bangladesh	2008	6.01379	45.2	54.8	0.288141
Least Developed Countries	Bangladesh	2009	5.04512	43.1	56.9	0.306665
Least Developed Countries	Bangladesh	2010	5.57179	40.28	59.72	0.34274
Least Developed Countries	Bangladesh	2011	6.46438	38.41	61.59	0.364567
Least Developed Countries	Bangladesh	2012	6.52146	37.31	62.69	0.384025
Least Developed Countries	Bangladesh	2013	6.01361	37.08	62.92	0.396697
Least Developed Countries	Bangladesh	2014	6.06106	35.32	64.68	0.413093
Least Developed Countries	Bangladesh	2015	6.55264	31.93	68.07	0.461997
Least Developed Countries	Bangladesh	2016	7.11348	30.49	69.51	0.470828
Least Developed Countries	Bangladesh	2017	6.59025	28.36	71.64	0.496852
Least Developed Countries	Bangladesh	2018	7.31941	26.88	73.12	0.517113
Least Developed Countries	Bangladesh	2019	7.88192	24.75	75.25	0.556529
Developing Countries	Barbados	1990	-3.30759	18.9422	81.0578	3.75575
Developing Countries	Barbados	1991	-3.89991	18.4837	81.5163	3.74171
Developing Countries	Barbados	1992	-5.69252	16.9804	83.0196	4.48857
Developing Countries	Barbados	1993	0.793068	15.1161	84.8839	3.78976
Developing Countries	Barbados	1994	2.01078	15.1125	84.8875	3.88836
Developing Countries	Barbados	1995	2.014	16.0343	83.9657	4.02324
Developing Countries	Barbados	1996	3.97648	16.8069	83.1931	3.96934
Developing Countries	Barbados	1997	4.7401	16.4023	83.5977	4.3254
Developing Countries	Barbados	1998	3.72846	12.1399	87.8601	4.71533
Developing Countries	Barbados	1999	0.334655	12.8109	87.1891	4.80671
Developing Countries	Barbados	2000	4.44719	14.32	85.68	4.56703
Developing Countries	Barbados	2001	-2.36546	12.56	87.44	4.80745
Developing Countries	Barbados	2002	0.787402	11.3	88.7	5.01055
Developing Countries	Barbados	2003	2.17548	9.95	90.05	5.03042
Developing Countries	Barbados	2004	1.4116	9.93	90.07	4.94037
Developing Countries	Barbados	2005	3.95546	9.91	90.09	5.13897
Developing Countries	Barbados	2006	6.11271	9.9	90.1	5.29777
Developing Countries	Barbados	2007	2.07765	9.71	90.29	5.31035
Developing Countries	Barbados	2008	0.640098	8.63	91.37	6.35837
Developing Countries	Barbados	2009	-5.01774	9.4	90.6	16.435
Developing Countries	Barbados	2010	-2.36516	9.08	90.92	5.4939
Developing Countries	Barbados	2011	-0.68778	4.66	95.34	6.21937
Developing Countries	Barbados	2012	-0.432679	4.21	95.79	7.47273
Developing Countries	Barbados	2013	-1.44741	3.51	96.49	5.06518
Developing Countries	Barbados	2014	-0.0872628	3.44	96.56	4.45888
Developing Countries	Barbados	2015	2.47262	3.16	96.84	4.45103
Developing Countries	Barbados	2016	2.53302	3.49	96.51	4.51368
Developing Countries	Barbados	2017	0.456292	5.13	94.87	4.12257
Developing Countries	Barbados	2018	-1.02714	5.79	94.21	4.32598
Developing Countries	Barbados	2019	-0.610275	4.31	95.69	4.35508
Economies in Transition	Belarus	1990	-8.1	0.817358	99.1826	9.79749
Economies in Transition	Belarus	1991	-1.2	0.898692	99.1013	9.43884
Economies in Transition	Belarus	1992	-9.6	1.04787	98.9521	8.61256
Economies in Transition	Belarus	1993	-7.6	1.25114	98.7489	7.46358
Economies in Transition	Belarus	1994	-11.7	2.07032	97.9297	6.33717
Economies in Transition	Belarus	1995	-10.4	2.52782	97.4722	5.6544
Economies in Transition	Belarus	1996	2.8	3.10131	96.8987	5.77288
Economies in Transition	Belarus	1997	11.4	3.39337	96.6066	5.84832
Economies in Transition	Belarus	1998	8.39999	3.64044	96.3596	5.68509
Economies in Transition	Belarus	1999	3.4	3.97586	96.0241	5.48035
Economies in Transition	Belarus	2000	5.8	5.65	94.35	5.30482
Economies in Transition	Belarus	2001	4.72531	6.26	93.74	5.22534
Economies in Transition	Belarus	2002	5.04527	6.52	93.48	5.25465
Economies in Transition	Belarus	2003	7.04319	6.25	93.75	5.37934
Economies in Transition	Belarus	2004	11.4497	6.27	93.73	5.75942
Economies in Transition	Belarus	2005	9.4	6.83	93.17	5.87547
Economies in Transition	Belarus	2006	9.99999	7.2	92.8	6.15518
Economies in Transition	Belarus	2007	8.60001	7.28	92.72	6.02973
Economies in Transition	Belarus	2008	10.2	7.08	92.92	6.35286
Economies in Transition	Belarus	2009	0.199995	7.39	92.61	6.03919
Economies in Transition	Belarus	2010	7.79827	7.3	92.7	6.50264
Economies in Transition	Belarus	2011	5.37871	7.52	92.48	6.18814
Economies in Transition	Belarus	2012	1.68714	7.25	92.75	6.34498
Economies in Transition	Belarus	2013	1.00347	6.97	93.03	6.35271
Economies in Transition	Belarus	2014	1.72638	6.69	93.31	6.29729
Economies in Transition	Belarus	2015	-3.82957	6.83	93.17	5.79427
Economies in Transition	Belarus	2016	-2.52645	6.74	93.26	5.82298
Economies in Transition	Belarus	2017	2.53218	7.29	92.71	5.92135
Economies in Transition	Belarus	2018	3.1492	7.22	92.78	6.24551
Economies in Transition	Belarus	2019	1.4	7.83	92.17	6.12224
Developed Countries	Belgium	1990	3.1374	1.26946	98.7305	10.9668
Developed Countries	Belgium	1991	1.83307	1.21508	98.7849	11.3909
Developed Countries	Belgium	1992	1.53065	1.19433	98.8057	11.1825
Developed Countries	Belgium	1993	-0.961873	0.956473	99.0435	10.9188
Developed Countries	Belgium	1994	3.22697	0.939573	99.0604	11.3587
Developed Countries	Belgium	1995	2.38476	1.26039	98.7396	11.3024
Developed Countries	Belgium	1996	1.32145	1.18441	98.8156	11.7608
Developed Countries	Belgium	1997	3.79366	1.14848	98.8515	11.4554
Developed Countries	Belgium	1998	1.96181	1.29196	98.708	11.7034
Developed Countries	Belgium	1999	3.54274	1.40065	98.5993	11.2953
Developed Countries	Belgium	2000	3.71668	1.44	98.56	11.4396
Developed Countries	Belgium	2001	1.09962	1.58	98.42	11.5043
Developed Countries	Belgium	2002	1.70688	1.68	98.32	10.728
Developed Countries	Belgium	2003	1.03798	1.89	98.11	11.1313
Developed Countries	Belgium	2004	3.5712	2.02	97.98	10.9412
Developed Countries	Belgium	2005	2.32174	2.46	97.54	10.5558
Developed Countries	Belgium	2006	2.55235	2.82	97.18	10.3006
Developed Countries	Belgium	2007	3.67688	3.34	96.66	9.84312
Developed Countries	Belgium	2008	0.446929	3.91	96.09	9.98415
Developed Countries	Belgium	2009	-2.02074	4.83	95.17	9.2317
Developed Countries	Belgium	2010	2.86429	6.22	93.78	9.79479
Developed Countries	Belgium	2011	1.69451	6.66	93.34	8.74051
Developed Countries	Belgium	2012	0.739217	7.67	92.33	8.57753
Developed Countries	Belgium	2013	0.459242	8.22	91.78	8.65548
Developed Countries	Belgium	2014	1.57853	9.13	90.87	8.04171
Developed Countries	Belgium	2015	2.04146	9.37	90.63	8.43785
Developed Countries	Belgium	2016	1.26669	9.2	90.8	8.31493
Developed Countries	Belgium	2017	1.61958	9.64	90.36	8.1511
Developed Countries	Belgium	2018	1.8439	10.66	89.34	8.19634
Developed Countries	Belgium	2019	2.11153	10.21	89.79	8.09558
Developing Countries	Belize	1990	11.4434	38.0116	61.9884	1.75949
Developing Countries	Belize	1991	11.464	32.4414	67.5586	2.24971
Developing Countries	Belize	1992	12.0583	36.2891	63.7109	2.57302
Developing Countries	Belize	1993	6.27578	35.5952	64.4048	2.37824
Developing Countries	Belize	1994	0.158422	34.0809	65.9191	2.23127
Developing Countries	Belize	1995	0.644487	34.9203	65.0797	2.22263
Developing Countries	Belize	1996	1.42911	42.6821	57.3179	1.68492
Developing Countries	Belize	1997	3.54465	36.6577	63.3423	2.07605
Developing Countries	Belize	1998	3.74051	35.3247	64.6753	1.95441
Developing Countries	Belize	1999	8.77885	35.0322	64.9678	1.71563
Developing Countries	Belize	2000	13.0196	34.55	65.45	1.81958
Developing Countries	Belize	2001	5.00888	29.61	70.39	2.07788
Developing Countries	Belize	2002	5.1216	31.19	68.81	1.98181
Developing Countries	Belize	2003	9.33587	30.18	69.82	1.8929
Developing Countries	Belize	2004	4.65024	32.02	67.98	1.59123
Developing Countries	Belize	2005	2.19801	31.01	68.99	1.65611
Developing Countries	Belize	2006	4.55752	36.8	63.2	1.75054
Developing Countries	Belize	2007	1.16652	32.31	67.69	1.77239
Developing Countries	Belize	2008	2.75504	34.06	65.94	1.62961
Developing Countries	Belize	2009	0.299812	29.18	70.82	4.64
Developing Countries	Belize	2010	3.3265	32.93	67.07	1.73662
Developing Countries	Belize	2011	1.6035	44.36	55.64	2.02885
Developing Countries	Belize	2012	2.42831	50.07	49.93	1.98224
Developing Countries	Belize	2013	0.845842	40.99	59.01	1.33061
Developing Countries	Belize	2014	4.46545	37.47	62.53	1.35836
Developing Countries	Belize	2015	2.89495	30.34	69.66	1.88404
Developing Countries	Belize	2016	-0.179507	33.38	66.62	1.76439
Developing Countries	Belize	2017	2.1286	36.25	63.75	1.70315
Developing Countries	Belize	2018	2.0447	34.64	65.36	1.6446
Developing Countries	Belize	2019	1.965	29.09	70.91	1.63955
Least Developed Countries	Benin	1990	8.97613	93.7032	6.29676	0.0662852
Least Developed Countries	Benin	1991	4.2258	94.9648	5.03515	0.0524323
Least Developed Countries	Benin	1992	2.95771	94.8518	5.14816	0.052515
Least Developed Countries	Benin	1993	5.83617	94.9888	5.0112	0.0525195
Least Developed Countries	Benin	1994	2.0204	94.975	5.02496	0.0490006
Least Developed Countries	Benin	1995	6.0452	94.772	5.22801	0.0507997
Least Developed Countries	Benin	1996	4.32428	84.146	15.854	0.159166
Least Developed Countries	Benin	1997	5.73469	80.6264	19.3736	0.197401
Least Developed Countries	Benin	1998	3.96101	79.5684	20.4316	0.187009
Least Developed Countries	Benin	1999	5.34145	76.9054	23.0946	0.201077
Least Developed Countries	Benin	2000	5.85771	70.29	29.71	0.206818
Least Developed Countries	Benin	2001	5.33314	66.86	33.14	0.245876
Least Developed Countries	Benin	2002	4.64303	64.04	35.96	0.298818
Least Developed Countries	Benin	2003	3.44358	61.73	38.27	0.324444
Least Developed Countries	Benin	2004	4.42968	60.69	39.31	0.341935
Least Developed Countries	Benin	2005	1.71316	59.2	40.8	0.363307
Least Developed Countries	Benin	2006	3.94374	57.31	42.69	0.422301
Least Developed Countries	Benin	2007	5.98635	54.49	45.51	0.473105
Least Developed Countries	Benin	2008	4.89658	54.76	45.24	0.462233
Least Developed Countries	Benin	2009	2.31929	52.83	47.17	0.494147
Least Developed Countries	Benin	2010	2.11406	47.19	52.81	0.525043
Least Developed Countries	Benin	2011	2.96375	48.7	51.3	0.4915
Least Developed Countries	Benin	2012	4.81122	50.33	49.67	0.456356
Least Developed Countries	Benin	2013	7.19143	51.97	48.03	0.467785
Least Developed Countries	Benin	2014	6.35768	51.05	48.95	0.504528
Least Developed Countries	Benin	2015	1.77815	49.94	50.06	0.520993
Least Developed Countries	Benin	2016	3.33967	45.42	54.58	0.619937
Least Developed Countries	Benin	2017	5.67156	45.38	54.62	0.614755
Least Developed Countries	Benin	2018	6.69726	43.97	56.03	0.646058
Least Developed Countries	Benin	2019	6.86569	46.47	53.53	0.618584
Least Developed Countries	Bhutan	1990	10.3831	95.8989	4.10115	0.150716
Least Developed Countries	Bhutan	1991	-0.407876	95.9199	4.08006	0.243156
Least Developed Countries	Bhutan	1992	4.60089	95.2875	4.71251	0.224498
Least Developed Countries	Bhutan	1993	1.98637	95.8581	4.14193	0.24409
Least Developed Countries	Bhutan	1994	4.9515	95.291	4.70904	0.263205
Least Developed Countries	Bhutan	1995	7.07412	94.3717	5.62825	0.299273
Least Developed Countries	Bhutan	1996	5.56517	93.24	6.75998	0.369364
Least Developed Countries	Bhutan	1997	5.37384	91.3501	8.64994	0.344382
Least Developed Countries	Bhutan	1998	5.91403	91.5315	8.46853	0.354372
Least Developed Countries	Bhutan	1999	7.98397	91.5656	8.43438	0.346089
Least Developed Countries	Bhutan	2000	3.35507	91.4	8.6	0.355322
Least Developed Countries	Bhutan	2001	8.34895	91.75	8.25	0.38102
Least Developed Countries	Bhutan	2002	10.9923	91.2	8.8	0.389595
Least Developed Countries	Bhutan	2003	7.8233	91.92	8.08	0.414118
Least Developed Countries	Bhutan	2004	6.00874	93.46	6.54	0.45397
Least Developed Countries	Bhutan	2005	7.28725	91.67	8.33	0.493261
Least Developed Countries	Bhutan	2006	6.99974	91.92	8.08	0.486763
Least Developed Countries	Bhutan	2007	18.3609	92.07	7.93	0.481295
Least Developed Countries	Bhutan	2008	4.79946	91.81	8.19	0.446687
Least Developed Countries	Bhutan	2009	6.74833	92.38	7.62	0.471747
Least Developed Countries	Bhutan	2010	11.9459	90.8	9.2	0.583514
Least Developed Countries	Bhutan	2011	7.98262	89.01	10.99	0.851006
Least Developed Countries	Bhutan	2012	5.1184	87.32	12.68	0.912224
Least Developed Countries	Bhutan	2013	2.11997	86.7	13.3	0.94335
Least Developed Countries	Bhutan	2014	5.7765	86.54	13.46	0.973503
Least Developed Countries	Bhutan	2015	6.64223	86.68	13.32	1.05786
Least Developed Countries	Bhutan	2016	8.12703	85.02	14.98	1.26238
Least Developed Countries	Bhutan	2017	4.65183	83.63	16.37	1.30103
Least Developed Countries	Bhutan	2018	3.05513	82.22	17.78	1.39184
Least Developed Countries	Bhutan	2019	5.75517	82.27	17.73	1.37598
Developing Countries	Bolivia	1990	4.63579	37.359	62.641	1.51642
Developing Countries	Bolivia	1991	5.26653	38.2815	61.7185	1.55032
Developing Countries	Bolivia	1992	1.6465	37.0527	62.9473	1.55706
Developing Countries	Bolivia	1993	4.2693	37.2354	62.7646	1.3948
Developing Countries	Bolivia	1994	4.66727	35.5194	64.4806	1.27498
Developing Countries	Bolivia	1995	4.67828	33.536	66.464	1.12564
Developing Countries	Bolivia	1996	4.36134	33.1373	66.8627	1.06565
Developing Countries	Bolivia	1997	4.95421	32.7612	67.2388	1.14898
Developing Countries	Bolivia	1998	5.02935	31.4021	68.5979	1.0708
Developing Countries	Bolivia	1999	0.426885	31.5448	68.4552	0.995511
Developing Countries	Bolivia	2000	2.50781	29.74	70.26	0.97526
Developing Countries	Bolivia	2001	1.6838	29.91	70.09	0.938202
Developing Countries	Bolivia	2002	2.48557	28.28	71.72	0.94935
Developing Countries	Bolivia	2003	2.71134	26.31	73.69	1.01956
Developing Countries	Bolivia	2004	4.1733	25.23	74.77	1.04642
Developing Countries	Bolivia	2005	4.42143	23.13	76.87	1.08857
Developing Countries	Bolivia	2006	4.79701	21.48	78.52	1.19526
Developing Countries	Bolivia	2007	4.56438	20.27	79.73	1.2638
Developing Countries	Bolivia	2008	6.1485	17.85	82.15	1.34856
Developing Countries	Bolivia	2009	3.357	16.21	83.79	1.41632
Developing Countries	Bolivia	2010	4.12672	15.34	84.66	1.50966
Developing Countries	Bolivia	2011	5.20409	13.54	86.46	1.62637
Developing Countries	Bolivia	2012	5.12228	12.8	87.2	1.6786
Developing Countries	Bolivia	2013	6.79601	12.06	87.94	1.77759
Developing Countries	Bolivia	2014	5.46057	10.55	89.45	1.90632
Developing Countries	Bolivia	2015	4.85719	8.02	91.98	1.90989
Developing Countries	Bolivia	2016	4.26392	7.95	92.05	1.99514
Developing Countries	Bolivia	2017	4.19521	7.27	92.73	2.03255
Developing Countries	Bolivia	2018	4.22362	7.37	92.63	2.04613
Developing Countries	Bolivia	2019	2.21671	8.67	91.33	1.9404
Developing Countries	Botswana	1990	6.77282	47.5846	52.4154	2.18379
Developing Countries	Botswana	1991	7.45871	48.0827	51.9173	2.05833
Developing Countries	Botswana	1992	2.91707	44.7083	55.2917	2.42017
Developing Countries	Botswana	1993	1.91611	45.8854	54.1146	2.32291
Developing Countries	Botswana	1994	3.62792	48.2732	51.7268	2.14775
Developing Countries	Botswana	1995	7.03041	47.174	52.826	2.17129
Developing Countries	Botswana	1996	5.8298	44.6888	55.3112	1.94056
Developing Countries	Botswana	1997	8.32589	43.999	56.001	1.99296
Developing Countries	Botswana	1998	0.443664	37.3976	62.6024	2.33528
Developing Countries	Botswana	1999	9.66724	39.8347	60.1653	2.39713
Developing Countries	Botswana	2000	1.9877	38.46	61.54	2.45233
Developing Countries	Botswana	2001	0.250574	37.51	62.49	2.3109
Developing Countries	Botswana	2002	6.06953	36.13	63.87	2.36414
Developing Countries	Botswana	2003	4.62589	36.21	63.79	2.26016
Developing Countries	Botswana	2004	2.70582	34.34	65.66	2.24861
Developing Countries	Botswana	2005	4.55665	33	67	2.379
Developing Countries	Botswana	2006	8.36387	31.4	68.6	2.22778
Developing Countries	Botswana	2007	8.27676	29.03	70.97	2.30344
Developing Countries	Botswana	2008	6.24544	27.86	72.14	2.29167
Developing Countries	Botswana	2009	-7.65231	28.29	71.71	2.14487
Developing Countries	Botswana	2010	8.56363	29.41	70.59	1.69593
Developing Countries	Botswana	2011	6.04836	28.41	71.59	1.92517
Developing Countries	Botswana	2012	4.45614	27.55	72.45	1.67194
Developing Countries	Botswana	2013	11.3434	26.36	73.64	2.62781
Developing Countries	Botswana	2014	4.14926	25.38	74.62	3.34671
Developing Countries	Botswana	2015	-5.71768	25.58	74.42	3.27719
Developing Countries	Botswana	2016	7.0369	26.13	73.87	3.06955
Developing Countries	Botswana	2017	4.00345	26.12	73.88	3.32415
Developing Countries	Botswana	2018	3.9804	25.76	74.24	3.24303
Developing Countries	Botswana	2019	3.34891	25.57	74.43	3.14711
Developing Countries	Brazil	1990	-4.35	49.8647	50.1353	1.32816
Developing Countries	Brazil	1991	1.03219	48.9382	51.0618	1.35498
Developing Countries	Brazil	1992	-0.544072	48.7012	51.2988	1.34754
Developing Countries	Brazil	1993	4.92469	48.1991	51.8009	1.3724
Developing Countries	Brazil	1994	5.85287	48.35	51.65	1.39557
Developing Countries	Brazil	1995	4.22379	46.1344	53.8656	1.4892
Developing Countries	Brazil	1996	2.20886	44.5329	55.4671	1.59409
Developing Countries	Brazil	1997	3.39485	43.7251	56.2749	1.6825
Developing Countries	Brazil	1998	0.338098	43.8616	56.1384	1.71151
Developing Countries	Brazil	1999	0.467938	44.0973	55.9027	1.74653
Developing Countries	Brazil	2000	4.38795	42.66	57.34	1.79455
Developing Countries	Brazil	2001	1.3899	41.33	58.67	1.80241
Developing Countries	Brazil	2002	3.05346	42.85	57.15	1.76988
Developing Countries	Brazil	2003	1.14083	45.11	54.89	1.70954
Developing Countries	Brazil	2004	5.75996	45.18	54.82	1.78537
Developing Countries	Brazil	2005	3.20213	46.13	53.87	1.78206
Developing Countries	Brazil	2006	3.96199	46.67	53.33	1.78363
Developing Countries	Brazil	2007	6.06987	47.19	52.81	1.85431
Developing Countries	Brazil	2008	5.0942	47.04	52.96	1.94568
Developing Countries	Brazil	2009	-0.125812	48.92	51.08	1.80518
Developing Countries	Brazil	2010	7.52823	46.81	53.19	2.03323
Developing Countries	Brazil	2011	3.97442	45.26	54.74	2.11787
Developing Countries	Brazil	2012	1.92118	43.49	56.51	2.27927
Developing Countries	Brazil	2013	3.00482	42.32	57.68	2.42166
Developing Countries	Brazil	2014	0.503956	41.71	58.29	2.52323
Developing Countries	Brazil	2015	-3.54576	43.62	56.38	2.37363
Developing Countries	Brazil	2016	-3.27592	45.46	54.54	2.16857
Developing Countries	Brazil	2017	1.32287	45.33	54.67	2.19642
Developing Countries	Brazil	2018	1.78367	46.95	53.05	2.07185
Developing Countries	Brazil	2019	1.22078	47.57	52.43	2.05781
Developed Countries	Bulgaria	1990	-9.11738	1.91685	98.0832	8.44317
Developed Countries	Bulgaria	1991	-8.44536	2.25055	97.7494	6.81505
Developed Countries	Bulgaria	1992	-7.27239	2.68107	97.3189	6.48231
Developed Countries	Bulgaria	1993	-1.48021	2.46783	97.5322	6.6015
Developed Countries	Bulgaria	1994	1.81801	2.38094	97.6191	6.36222
Developed Countries	Bulgaria	1995	2.85505	3.10671	96.8933	6.52862
Developed Countries	Bulgaria	1996	5.20539	3.54634	96.4537	6.6126
Developed Countries	Bulgaria	1997	-14.1154	3.80966	96.1903	6.37507
Developed Countries	Bulgaria	1998	3.78912	5.88974	94.1103	6.11376
Developed Countries	Bulgaria	1999	-8.39609	6.62751	93.3725	5.39788
Developed Countries	Bulgaria	2000	4.58723	7.97	92.03	5.31445
Developed Countries	Bulgaria	2001	3.8237	7.24	92.76	5.76716
Developed Countries	Bulgaria	2002	5.87193	8.7	91.3	5.56324
Developed Countries	Bulgaria	2003	5.23715	9.16	90.84	6.16437
Developed Countries	Bulgaria	2004	6.51043	9.55	90.45	6.12555
Developed Countries	Bulgaria	2005	7.05635	9.83	90.17	6.26585
Developed Countries	Bulgaria	2006	6.80259	9.96	90.04	6.43992
Developed Countries	Bulgaria	2007	6.59138	8.85	91.15	6.97119
Developed Countries	Bulgaria	2008	6.11602	9.94	90.06	6.67862
Developed Countries	Bulgaria	2009	-3.27185	11.62	88.38	5.76403
Developed Countries	Bulgaria	2010	1.5418	14.27	85.73	6.04954
Developed Countries	Bulgaria	2011	2.10121	13.22	86.78	6.75528
Developed Countries	Bulgaria	2012	0.75493	15.63	84.37	6.16215
Developed Countries	Bulgaria	2013	-0.560494	18.24	81.76	5.45896
Developed Countries	Bulgaria	2014	0.966869	17.15	82.85	5.82092
Developed Countries	Bulgaria	2015	3.42805	17.85	82.15	6.20787
Developed Countries	Bulgaria	2016	3.03983	17.71	82.29	5.83488
Developed Countries	Bulgaria	2017	2.76217	17.12	82.88	6.20129
Developed Countries	Bulgaria	2018	2.68458	19.6	80.4	5.82203
Developed Countries	Bulgaria	2019	4.03759	19.34	80.66	5.61086
Least Developed Countries	Burkina Faso	1990	-0.602928	93.1581	6.84194	0.056747
Least Developed Countries	Burkina Faso	1991	9.06998	93.2538	6.74618	0.0563531
Least Developed Countries	Burkina Faso	1992	0.232711	93.2901	6.7099	0.0559314
Least Developed Countries	Burkina Faso	1993	3.46138	93.48	6.52001	0.055483
Least Developed Countries	Burkina Faso	1994	1.31501	93.6081	6.39191	0.055009
Least Developed Countries	Burkina Faso	1995	5.71637	93.1402	6.8598	0.0564922
Least Developed Countries	Burkina Faso	1996	11.0147	92.1566	7.84341	0.0607362
Least Developed Countries	Burkina Faso	1997	6.31683	91.391	8.60905	0.0646943
Least Developed Countries	Burkina Faso	1998	7.30772	91.0125	8.98745	0.0692879
Least Developed Countries	Burkina Faso	1999	7.39524	86.8549	13.1451	0.0788819
Least Developed Countries	Burkina Faso	2000	1.88847	85.41	14.59	0.080979
Least Developed Countries	Burkina Faso	2001	6.61341	83.68	16.32	0.0812083
Least Developed Countries	Burkina Faso	2002	4.35296	79.34	20.66	0.0780926
Least Developed Countries	Burkina Faso	2003	7.80249	79.08	20.92	0.0821834
Least Developed Countries	Burkina Faso	2004	4.47845	83.53	16.47	0.0813471
Least Developed Countries	Burkina Faso	2005	8.66187	86.54	13.46	0.0789752
Least Developed Countries	Burkina Faso	2006	6.25316	84.62	15.38	0.0896655
Least Developed Countries	Burkina Faso	2007	4.11138	82.43	17.57	0.0989333
Least Developed Countries	Burkina Faso	2008	5.79999	82.94	17.06	0.115727
Least Developed Countries	Burkina Faso	2009	2.96195	83.6	16.4	0.114259
Least Developed Countries	Burkina Faso	2010	8.44628	81.45	18.55	0.146746
Least Developed Countries	Burkina Faso	2011	6.62256	80.57	19.43	0.152967
Least Developed Countries	Burkina Faso	2012	6.45267	77.18	22.82	0.177416
Least Developed Countries	Burkina Faso	2013	5.79258	75.43	24.57	0.183333
Least Developed Countries	Burkina Faso	2014	4.32685	75.24	24.76	0.180825
Least Developed Countries	Burkina Faso	2015	3.92123	72.71	27.29	0.2043
Least Developed Countries	Burkina Faso	2016	5.95798	72.27	27.73	0.19843
Least Developed Countries	Burkina Faso	2017	6.20349	69.08	30.92	0.222474
Least Developed Countries	Burkina Faso	2018	6.60457	66.97	33.03	0.236438
Least Developed Countries	Burkina Faso	2019	5.68812	64.85	35.15	0.246046
Least Developed Countries	Burundi	1990	3.49982	95.2007	4.79933	0.031256
Least Developed Countries	Burundi	1991	4.99684	94.2387	5.76134	0.0395333
Least Developed Countries	Burundi	1992	1.01	94.9958	5.00422	0.0316591
Least Developed Countries	Burundi	1993	-6.24	94.9071	5.09291	0.0327696
Least Developed Countries	Burundi	1994	-3.83	95.118	4.88204	0.032209
Least Developed Countries	Burundi	1995	-7.92	95.1118	4.88816	0.0334055
Least Developed Countries	Burundi	1996	-8	95.1893	4.81067	0.0346528
Least Developed Countries	Burundi	1997	-1.59	95.2428	4.75721	0.0343018
Least Developed Countries	Burundi	1998	4.75	95.2617	4.7383	0.0355667
Least Developed Countries	Burundi	1999	-1.01	93.7496	6.2504	0.0366994
Least Developed Countries	Burundi	2000	-0.856864	93.23	6.77	0.0407596
Least Developed Countries	Burundi	2001	2.05581	94.84	5.16	0.0306488
Least Developed Countries	Burundi	2002	4.44652	94.65	5.35	0.031324
Least Developed Countries	Burundi	2003	-1.22373	95.76	4.24	0.0231577
Least Developed Countries	Burundi	2004	4.83366	96.04	3.96	0.0210329
Least Developed Countries	Burundi	2005	0.9	96.01	3.99	0.020367
Least Developed Countries	Burundi	2006	5.41381	95.31	4.69	0.0236598
Least Developed Countries	Burundi	2007	3.45195	95.29	4.71	0.0228943
Least Developed Countries	Burundi	2008	4.86171	95.15	4.85	0.0221508
Least Developed Countries	Burundi	2009	3.81275	95.18	4.82	0.0214345
Least Developed Countries	Burundi	2010	5.12416	92.57	7.43	0.0345797
Least Developed Countries	Burundi	2011	4.0326	91.65	8.35	0.0401857
Least Developed Countries	Burundi	2012	4.44671	91.45	8.55	0.0400173
Least Developed Countries	Burundi	2013	4.92419	91.08	8.92	0.0408792
Least Developed Countries	Burundi	2014	4.24065	91.28	8.72	0.038601
Least Developed Countries	Burundi	2015	-3.9	91.15	8.85	0.0393699
Least Developed Countries	Burundi	2016	-0.600001	89.52	10.48	0.0419527
Least Developed Countries	Burundi	2017	0.500001	88.12	11.88	0.0489516
Least Developed Countries	Burundi	2018	1.60994	85.58	14.42	0.0617429
Least Developed Countries	Burundi	2019	1.81257	84.77	15.23	0.0624427
Developing Countries	Cabo Verde	1990	0.692172	36.634	63.366	0.295899
Developing Countries	Cabo Verde	1991	1.40415	38.0853	61.9147	0.288826
Developing Countries	Cabo Verde	1992	10.9376	37.961	62.039	0.309195
Developing Countries	Cabo Verde	1993	8.70831	39.4819	60.5181	0.3005
Developing Countries	Cabo Verde	1994	19.1826	40.4119	59.5881	0.292235
Developing Countries	Cabo Verde	1995	14.2116	39.0786	60.9214	0.310649
Developing Countries	Cabo Verde	1996	11.3465	36.1614	63.8386	0.353953
Developing Countries	Cabo Verde	1997	11.1184	36.5798	63.4202	0.371059
Developing Countries	Cabo Verde	1998	12.5173	35.2536	64.7464	0.387867
Developing Countries	Cabo Verde	1999	11.2226	31.1712	68.8288	0.45189
Developing Countries	Cabo Verde	2000	14.2849	27.88	72.12	0.513805
Developing Countries	Cabo Verde	2001	2.23165	25.97	74.03	0.550836
Developing Countries	Cabo Verde	2002	5.25089	25.98	74.02	0.632118
Developing Countries	Cabo Verde	2003	4.17626	24.83	75.17	0.689004
Developing Countries	Cabo Verde	2004	10.1971	25.59	74.41	0.722703
Developing Countries	Cabo Verde	2005	6.91246	23.88	76.12	0.950254
Developing Countries	Cabo Verde	2006	7.98375	21.8	78.2	1.06571
Developing Countries	Cabo Verde	2007	15.1707	21.83	78.17	0.968284
Developing Countries	Cabo Verde	2008	6.65052	23.81	76.19	0.998241
Developing Countries	Cabo Verde	2009	-1.27043	22.08	77.92	1.04794
Developing Countries	Cabo Verde	2010	1.46679	21.22	78.78	1.09613
Developing Countries	Cabo Verde	2011	3.96889	20.78	79.22	1.14261
Developing Countries	Cabo Verde	2012	1.08192	24.26	75.74	1.049
Developing Countries	Cabo Verde	2013	0.802798	25.94	74.06	0.9966
Developing Countries	Cabo Verde	2014	0.611213	26.11	73.89	0.964737
Developing Countries	Cabo Verde	2015	1.00686	26.35	73.65	0.952853
Developing Countries	Cabo Verde	2016	4.70579	24.62	75.38	1.03551
Developing Countries	Cabo Verde	2017	3.70204	22.87	77.13	1.09768
Developing Countries	Cabo Verde	2018	4.53116	22.93	77.07	1.12181
Developing Countries	Cabo Verde	2019	5.66775	22.19	77.81	1.18196
Developing Countries	Cameroon	1990	-6.1057	81.5931	18.4069	0.246178
Developing Countries	Cameroon	1991	-3.8086	83.1896	16.8104	0.574234
Developing Countries	Cameroon	1992	-3.1	84.4345	15.5655	0.548022
Developing Countries	Cameroon	1993	-7.93207	83.9366	16.0634	0.448535
Developing Countries	Cameroon	1994	1.87681	83.6094	16.3906	0.349181
Developing Countries	Cameroon	1995	2.894	84.4774	15.5226	0.344118
Developing Countries	Cameroon	1996	4.21507	84.9378	15.0622	0.34071
Developing Countries	Cameroon	1997	4.52731	84.5769	15.4231	0.338807
Developing Countries	Cameroon	1998	4.72553	84.3766	15.6234	0.342304
Developing Countries	Cameroon	1999	4.5113	86.1299	13.8701	0.316954
Developing Countries	Cameroon	2000	3.83242	84.59	15.41	0.335827
Developing Countries	Cameroon	2001	4.32426	85.3	14.7	0.323939
Developing Countries	Cameroon	2002	4.47703	85.26	14.74	0.313616
Developing Countries	Cameroon	2003	5.45315	85.3	14.7	0.310103
Developing Countries	Cameroon	2004	7.04886	85.53	14.47	0.296651
Developing Countries	Cameroon	2005	2.22827	86.31	13.69	0.283082
Developing Countries	Cameroon	2006	3.80958	85.51	14.49	0.279307
Developing Countries	Cameroon	2007	4.32759	80.82	19.18	0.327277
Developing Countries	Cameroon	2008	2.84768	80.82	19.18	0.331902
Developing Countries	Cameroon	2009	2.57925	79.25	20.75	0.355231
Developing Countries	Cameroon	2010	2.89902	78.76	21.24	0.34462
Developing Countries	Cameroon	2011	3.37921	78.61	21.39	0.325738
Developing Countries	Cameroon	2012	4.62598	78.53	21.47	0.320219
Developing Countries	Cameroon	2013	4.99553	77.6	22.4	0.34198
Developing Countries	Cameroon	2014	5.71982	76.79	23.21	0.363727
Developing Countries	Cameroon	2015	5.66695	78.06	21.94	0.363115
Developing Countries	Cameroon	2016	4.53579	78.78	21.22	0.379495
Developing Countries	Cameroon	2017	3.54118	79.17	20.83	0.373279
Developing Countries	Cameroon	2018	3.95551	79.25	20.75	0.38031
Developing Countries	Cameroon	2019	3.47506	79.41	20.59	0.364425
Least Developed Countries	Central African Republic	1990	-2.14753	93.4943	6.50572	0.0534428
Least Developed Countries	Central African Republic	1991	-0.552543	93.7522	6.24775	0.0486363
Least Developed Countries	Central African Republic	1992	-6.42408	94.1079	5.89215	0.0506888
Least Developed Countries	Central African Republic	1993	0.335276	93.8146	6.18538	0.0525254
Least Developed Countries	Central African Republic	1994	4.89995	93.1876	6.81236	0.0510364
Least Developed Countries	Central African Republic	1995	7.20005	93.0462	6.95377	0.0496484
Least Developed Countries	Central African Republic	1996	-4.00009	91.6648	8.33517	0.0513869
Least Developed Countries	Central African Republic	1997	5.29994	91.858	8.14196	0.0501115
Least Developed Countries	Central African Republic	1998	4.70014	89.0176	10.9824	0.0661778
Least Developed Countries	Central African Republic	1999	3.59997	85.4095	14.5905	0.0674533
Least Developed Countries	Central African Republic	2000	-2.48943	88.9	11.1	0.0659264
Least Developed Countries	Central African Republic	2001	4.46474	88.92	11.08	0.0671679
Least Developed Countries	Central African Republic	2002	3.61654	89.22	10.78	0.0657526
Least Developed Countries	Central African Republic	2003	-5.39749	90.25	9.75	0.0592603
Least Developed Countries	Central African Republic	2004	5.99488	90.64	9.36	0.0580825
Least Developed Countries	Central African Republic	2005	0.908211	90.96	9.04	0.0544773
Least Developed Countries	Central African Republic	2006	4.77109	90.8	9.2	0.0558513
Least Developed Countries	Central African Republic	2007	4.60753	90.88	9.12	0.05717
Least Developed Countries	Central African Republic	2008	2.05413	93.64	6.36	0.0397813
Least Developed Countries	Central African Republic	2009	8.58726	93.91	6.09	0.039192
Least Developed Countries	Central African Republic	2010	4.63082	93.84	6.16	0.0387529
Least Developed Countries	Central African Republic	2011	4.19462	93.33	6.67	0.0429997
Least Developed Countries	Central African Republic	2012	5.05376	93.07	6.93	0.0450815
Least Developed Countries	Central African Republic	2013	-36.392	95.08	4.92	0.0269788
Least Developed Countries	Central African Republic	2014	0.0810705	94.82	5.18	0.0291207
Least Developed Countries	Central African Republic	2015	4.33712	92.86	7.14	0.0422864
Least Developed Countries	Central African Republic	2016	4.75032	92.11	7.89	0.0462791
Least Developed Countries	Central African Republic	2017	4.52728	91.58	8.42	0.0478675
Least Developed Countries	Central African Republic	2018	3.78944	91.42	8.58	0.0492888
Least Developed Countries	Central African Republic	2019	3.1	91.26	8.74	0.0505776
Least Developed Countries	Chad	1990	-4.17847	98.1635	1.83647	0.0654006
Least Developed Countries	Chad	1991	8.53514	98.3037	1.69629	0.0649658
Least Developed Countries	Chad	1992	8.00144	98.2282	1.77182	0.0644985
Least Developed Countries	Chad	1993	-15.7098	98.1738	1.8262	0.0624626
Least Developed Countries	Chad	1994	10.1369	98.1237	1.87632	0.0634119
Least Developed Countries	Chad	1995	1.23655	98.1385	1.86148	0.0627661
Least Developed Countries	Chad	1996	2.21447	98.0886	1.91142	0.0620606
Least Developed Countries	Chad	1997	5.65339	97.9238	2.07622	0.0626375
Least Developed Countries	Chad	1998	6.95158	97.6012	2.39878	0.0604886
Least Developed Countries	Chad	1999	-0.68285	97.3004	2.69964	0.0608429
Least Developed Countries	Chad	2000	-0.879681	88.7	11.3	0.034707
Least Developed Countries	Chad	2001	11.6581	88.6	11.4	0.0391793
Least Developed Countries	Chad	2002	8.49121	88.53	11.47	0.0443497
Least Developed Countries	Chad	2003	14.7217	83.91	16.09	0.0480056
Least Developed Countries	Chad	2004	33.6294	84	16	0.0462261
Least Developed Countries	Chad	2005	17.3325	83.82	16.18	0.0475406
Least Developed Countries	Chad	2006	0.648262	83.74	16.26	0.0487706
Least Developed Countries	Chad	2007	3.2715	82.8	17.2	0.0462191
Least Developed Countries	Chad	2008	3.05269	80.63	19.37	0.048285
Least Developed Countries	Chad	2009	4.2177	79.78	20.22	0.0683383
Least Developed Countries	Chad	2010	13.5501	79.01	20.99	0.103747
Least Developed Countries	Chad	2011	0.0828698	82.37	17.63	0.0889897
Least Developed Countries	Chad	2012	8.88258	79.73	20.27	0.145486
Least Developed Countries	Chad	2013	5.7	76.45	23.55	0.165653
Least Developed Countries	Chad	2014	6.89999	76.86	23.14	0.165403
Least Developed Countries	Chad	2015	2.76768	77.35	22.65	0.169372
Least Developed Countries	Chad	2016	-6.25553	77.77	22.23	0.151768
Least Developed Countries	Chad	2017	-2.9887	78.27	21.73	0.143173
Least Developed Countries	Chad	2018	2.37404	77.7	22.3	0.141494
Least Developed Countries	Chad	2019	3.24718	77.79	22.21	0.141093
Developing Countries	Chile	1990	3.33357	34.0269	65.9731	2.29912
Developing Countries	Chile	1991	7.80439	37.2728	62.7272	2.17113
Developing Countries	Chile	1992	11.1667	38.6177	61.3823	2.20994
Developing Countries	Chile	1993	6.58878	35.7704	64.2296	2.31769
Developing Countries	Chile	1994	5.0302	34.8177	65.1823	2.51582
Developing Countries	Chile	1995	8.9333	34.1675	65.8325	2.70985
Developing Countries	Chile	1996	6.80292	32.2307	67.7693	3.07801
Developing Countries	Chile	1997	7.39174	29.9536	70.0464	3.46877
Developing Countries	Chile	1998	4.18089	29.7452	70.2548	3.47249
Developing Countries	Chile	1999	-0.273631	29.0542	70.9458	3.58971
Developing Countries	Chile	2000	4.97162	31.36	68.64	3.28633
Developing Countries	Chile	2001	3.15403	32.15	67.85	3.12127
Developing Countries	Chile	2002	3.2028	33.07	66.93	3.13177
Developing Countries	Chile	2003	4.72325	31.62	68.38	3.16726
Developing Countries	Chile	2004	6.67425	31.44	68.56	3.43241
Developing Countries	Chile	2005	5.83705	32.26	67.74	3.45863
Developing Countries	Chile	2006	6.04999	32.91	67.09	3.49445
Developing Countries	Chile	2007	5.16823	30.46	69.54	3.90618
Developing Countries	Chile	2008	3.78939	30.83	69.17	4.06925
Developing Countries	Chile	2009	-1.11804	31.53	68.47	3.87595
Developing Countries	Chile	2010	5.85165	27.04	72.96	4.0879
Developing Countries	Chile	2011	6.2239	28.79	71.21	4.43727
Developing Countries	Chile	2012	6.15534	30.31	69.69	4.50623
Developing Countries	Chile	2013	3.30851	30.23	69.77	4.72356
Developing Countries	Chile	2014	1.79265	26.95	73.05	4.31106
Developing Countries	Chile	2015	2.15194	25.07	74.93	4.57612
Developing Countries	Chile	2016	1.75304	24.55	75.45	4.74983
Developing Countries	Chile	2017	1.3577	24.11	75.89	4.71402
Developing Countries	Chile	2018	3.99003	25.46	74.54	4.62434
Developing Countries	Chile	2019	0.77054	25.26	74.74	4.82112
Developing Countries	China	1990	3.92025	34.0836	65.9164	1.91454
Developing Countries	China	1991	9.26279	33.2585	66.7415	2.00054
Developing Countries	China	1992	14.2245	32.9313	67.0687	2.07574
Developing Countries	China	1993	13.8837	31.6778	68.3222	2.24484
Developing Countries	China	1994	13.0368	31.2495	68.7505	2.32219
Developing Countries	China	1995	10.954	29.4721	70.5279	2.56348
Developing Countries	China	1996	9.92256	30.5372	69.4628	2.52188
Developing Countries	China	1997	9.23678	30.1835	69.8165	2.5479
Developing Countries	China	1998	7.84595	29.7399	70.2601	2.60584
Developing Countries	China	1999	7.66165	30.506	69.494	2.51742
Developing Countries	China	2000	8.49009	29.63	70.37	2.65041
Developing Countries	China	2001	8.33573	28.36	71.64	2.77476
Developing Countries	China	2002	9.13363	27	73	2.97568
Developing Countries	China	2003	10.038	23.86	76.14	3.42744
Developing Countries	China	2004	10.1136	20.17	79.83	3.95411
Developing Countries	China	2005	11.3946	17.44	82.56	4.4677
Developing Countries	China	2006	12.721	16.39	83.61	4.91028
Developing Countries	China	2007	14.2309	14.88	85.12	5.30637
Developing Countries	China	2008	9.65068	14.14	85.86	5.43508
Developing Countries	China	2009	9.39873	13.43	86.57	5.79832
Developing Countries	China	2010	10.6359	12.26	87.74	6.33542
Developing Countries	China	2011	9.55083	11.34	88.66	6.90134
Developing Countries	China	2012	7.86374	11.53	88.47	7.04618
Developing Countries	China	2013	7.76615	11.45	88.55	7.32415
Developing Countries	China	2014	7.42576	11.94	88.06	7.29424
Developing Countries	China	2015	7.04133	12.18	87.82	7.14645
Developing Countries	China	2016	6.84876	12.56	87.44	7.11539
Developing Countries	China	2017	6.9472	13.13	86.87	7.23099
Developing Countries	China	2018	6.74977	13.71	86.29	7.48733
Developing Countries	China	2019	5.9505	14.45	85.55	7.60594
Developing Countries	Colombia	1990	4.282	38.2512	61.7488	1.47209
Developing Countries	Colombia	1991	2.00161	37.0012	62.9988	1.49415
Developing Countries	Colombia	1992	4.04493	33.2275	66.7725	1.52545
Developing Countries	Colombia	1993	5.38541	33.2048	66.7952	1.59242
Developing Countries	Colombia	1994	5.81466	33.9722	66.0278	1.58785
Developing Countries	Colombia	1995	5.20244	33.6999	66.3001	1.62844
Developing Countries	Colombia	1996	2.05585	33.7754	66.2246	1.58187
Developing Countries	Colombia	1997	3.43029	25.8003	74.1997	1.70158
Developing Countries	Colombia	1998	0.569784	25.9387	74.0613	1.67969
Developing Countries	Colombia	1999	-4.20402	29.1355	70.8645	1.42053
Developing Countries	Colombia	2000	2.92486	28.03	71.97	1.47212
Developing Countries	Colombia	2001	1.6779	27.24	72.76	1.46413
Developing Countries	Colombia	2002	2.50398	28.8	71.2	1.38886
Developing Countries	Colombia	2003	3.91827	30.7	69.3	1.35257
Developing Countries	Colombia	2004	5.33302	29.18	70.82	1.33354
Developing Countries	Colombia	2005	4.82876	29.08	70.92	1.35154
Developing Countries	Colombia	2006	6.71687	29.69	70.31	1.33539
Developing Countries	Colombia	2007	6.73819	30.42	69.58	1.35307
Developing Countries	Colombia	2008	3.28345	29.97	70.03	1.35081
Developing Countries	Colombia	2009	1.13965	30.91	69.09	1.3857
Developing Countries	Colombia	2010	4.49466	29.75	70.25	1.40549
Developing Countries	Colombia	2011	6.94789	28.91	71.09	1.51327
Developing Countries	Colombia	2012	3.91264	28.9	71.1	1.51273
Developing Countries	Colombia	2013	5.13399	32.29	67.71	1.65306
Developing Countries	Colombia	2014	4.49903	32.38	67.62	1.68626
Developing Countries	Colombia	2015	2.9559	31.6	68.4	1.68832
Developing Countries	Colombia	2016	2.08738	30.74	69.26	1.71624
Developing Countries	Colombia	2017	1.35936	32.53	67.47	1.53323
Developing Countries	Colombia	2018	2.56432	30.72	69.28	1.58253
Developing Countries	Colombia	2019	3.18686	30.72	69.28	1.60987
Least Developed Countries	Comoros	1990	5.09124	49.8386	50.1614	0.170069
Least Developed Countries	Comoros	1991	-5.39564	50.7127	49.2873	0.165144
Least Developed Countries	Comoros	1992	8.53098	50.2447	49.7553	0.160383
Least Developed Countries	Comoros	1993	3.00606	49.952	50.048	0.155808
Least Developed Countries	Comoros	1994	-5.27678	59.9592	40.0408	0.151423
Least Developed Countries	Comoros	1995	3.61021	59.5435	40.4565	0.168281
Least Developed Countries	Comoros	1996	-1.29169	60.8022	39.1978	0.163725
Least Developed Countries	Comoros	1997	4.03015	59.7811	40.2189	0.159377
Least Developed Countries	Comoros	1998	1.28252	49.9614	50.0386	0.174628
Least Developed Countries	Comoros	1999	1.92441	49.5941	50.4059	0.189088
Least Developed Countries	Comoros	2000	10.8479	69.87	30.13	0.18438
Least Developed Countries	Comoros	2001	2.33291	69.51	30.49	0.197879
Least Developed Countries	Comoros	2002	2.32494	70.31	29.69	0.193159
Least Developed Countries	Comoros	2003	2.10387	64.39	35.61	0.24005
Least Developed Countries	Comoros	2004	1.91966	63.52	36.48	0.25116
Least Developed Countries	Comoros	2005	2.83755	65.74	34.26	0.245248
Least Developed Countries	Comoros	2006	2.64696	61.81	38.19	0.27138
Least Developed Countries	Comoros	2007	0.800042	74.36	25.64	0.17144
Least Developed Countries	Comoros	2008	3.96461	73.44	26.56	0.16737
Least Developed Countries	Comoros	2009	3.24074	68.53	31.47	0.207946
Least Developed Countries	Comoros	2010	3.77777	66.39	33.61	0.246485
Least Developed Countries	Comoros	2011	4.14351	69.35	30.65	0.212291
Least Developed Countries	Comoros	2012	3.16841	67.85	32.15	0.221036
Least Developed Countries	Comoros	2013	4.46625	62.51	37.49	0.256234
Least Developed Countries	Comoros	2014	2.10666	66.02	33.98	0.223864
Least Developed Countries	Comoros	2015	1.14735	64.17	35.83	0.244393
Least Developed Countries	Comoros	2016	3.32045	60.5	39.5	0.276522
Least Developed Countries	Comoros	2017	3.81576	56.42	43.58	0.344027
Least Developed Countries	Comoros	2018	3.64245	55.01	44.99	0.360437
Least Developed Countries	Comoros	2019	1.76079	53.43	46.57	0.376076
Least Developed Countries	Congo, Dem. Rep.	1990	-6.56831	92.0477	7.95227	0.0918756
Least Developed Countries	Congo, Dem. Rep.	1991	-8.42105	95.1388	4.86119	0.0484568
Least Developed Countries	Congo, Dem. Rep.	1992	-10.5	95.8752	4.12477	0.0396422
Least Developed Countries	Congo, Dem. Rep.	1993	-13.4691	96.1133	3.88673	0.0489491
Least Developed Countries	Congo, Dem. Rep.	1994	-3.9	96.6091	3.39087	0.0549028
Least Developed Countries	Congo, Dem. Rep.	1995	0.699999	96.8957	3.10432	0.0507501
Least Developed Countries	Congo, Dem. Rep.	1996	-1.02317	96.9616	3.03842	0.0530904
Least Developed Countries	Congo, Dem. Rep.	1997	-5.61705	97.0586	2.94144	0.0517943
Least Developed Countries	Congo, Dem. Rep.	1998	-1.62415	96.85	3.15003	0.0508362
Least Developed Countries	Congo, Dem. Rep.	1999	-4.27014	96.997	3.00297	0.0455143
Least Developed Countries	Congo, Dem. Rep.	2000	-6.91093	97.94	2.06	0.0346029
Least Developed Countries	Congo, Dem. Rep.	2001	-2.10017	98.34	1.66	0.0324189
Least Developed Countries	Congo, Dem. Rep.	2002	2.94777	98.27	1.73	0.0330849
Least Developed Countries	Congo, Dem. Rep.	2003	5.57782	97.97	2.03	0.0388911
Least Developed Countries	Congo, Dem. Rep.	2004	6.73837	97.88	2.12	0.0365563
Least Developed Countries	Congo, Dem. Rep.	2005	6.13515	97.42	2.58	0.0403389
Least Developed Countries	Congo, Dem. Rep.	2006	5.32098	97.33	2.67	0.0402983
Least Developed Countries	Congo, Dem. Rep.	2007	6.25948	97.17	2.83	0.0422557
Least Developed Countries	Congo, Dem. Rep.	2008	6.22589	96.97	3.03	0.0422107
Least Developed Countries	Congo, Dem. Rep.	2009	2.85506	97.02	2.98	0.0400329
Least Developed Countries	Congo, Dem. Rep.	2010	7.10798	96.81	3.19	0.0410446
Least Developed Countries	Congo, Dem. Rep.	2011	6.87467	96.21	3.79	0.04524
Least Developed Countries	Congo, Dem. Rep.	2012	7.0869	95.47	4.53	0.0410022
Least Developed Countries	Congo, Dem. Rep.	2013	8.48196	93.92	6.08	0.0554942
Least Developed Countries	Congo, Dem. Rep.	2014	9.47029	92.87	7.13	0.0696784
Least Developed Countries	Congo, Dem. Rep.	2015	6.91617	95.82	4.18	0.0423637
Least Developed Countries	Congo, Dem. Rep.	2016	2.3994	97.03	2.97	0.0307149
Least Developed Countries	Congo, Dem. Rep.	2017	3.72695	96.7	3.3	0.0350128
Least Developed Countries	Congo, Dem. Rep.	2018	5.82112	96.38	3.62	0.0371128
Least Developed Countries	Congo, Dem. Rep.	2019	4.38453	96.24	3.76	0.0369856
Least Developed Countries	Congo, Rep.	1990	1	65.4138	34.5862	1.35781
Least Developed Countries	Congo, Rep.	1991	2.39537	64.5627	35.4373	1.31692
Least Developed Countries	Congo, Rep.	1992	2.61195	67.6029	32.3971	1.25706
Least Developed Countries	Congo, Rep.	1993	-0.979683	68.4127	31.5873	1.05083
Least Developed Countries	Congo, Rep.	1994	-5.49308	76.4709	23.5291	0.782572
Least Developed Countries	Congo, Rep.	1995	3.98532	69.7958	30.2042	0.975058
Least Developed Countries	Congo, Rep.	1996	4.29048	75.4097	24.5903	1.13791
Least Developed Countries	Congo, Rep.	1997	-0.624812	80.153	19.847	1.14045
Least Developed Countries	Congo, Rep.	1998	3.73755	79.7348	20.2652	1.31452
Least Developed Countries	Congo, Rep.	1999	-2.5822	76.9547	23.0453	1.3033
Least Developed Countries	Congo, Rep.	2000	7.57598	64.86	35.14	1.39092
Least Developed Countries	Congo, Rep.	2001	3.8026	61.18	38.82	1.31762
Least Developed Countries	Congo, Rep.	2002	4.58187	68.53	31.47	0.833742
Least Developed Countries	Congo, Rep.	2003	0.813264	61.99	38.01	0.948072
Least Developed Countries	Congo, Rep.	2004	3.47663	63.03	36.97	1.00272
Least Developed Countries	Congo, Rep.	2005	7.75576	63.11	36.89	1.1897
Least Developed Countries	Congo, Rep.	2006	7.98624	69.42	30.58	1.27632
Least Developed Countries	Congo, Rep.	2007	-6.61399	60.34	39.66	1.07066
Least Developed Countries	Congo, Rep.	2008	6.30638	56.86	43.14	1.08688
Least Developed Countries	Congo, Rep.	2009	11.6373	56.03	43.97	1.16756
Least Developed Countries	Congo, Rep.	2010	9.93127	54.8	45.2	1.26821
Least Developed Countries	Congo, Rep.	2011	2.20592	64.62	35.38	1.22416
Least Developed Countries	Congo, Rep.	2012	9.94715	65.3	34.7	1.16625
Least Developed Countries	Congo, Rep.	2013	-0.712434	62.47	37.53	1.15299
Least Developed Countries	Congo, Rep.	2014	6.71668	62.23	37.77	1.09564
Least Developed Countries	Congo, Rep.	2015	-3.55058	64.15	35.85	1.16555
Least Developed Countries	Congo, Rep.	2016	-10.7832	67.61	32.39	1.1042
Least Developed Countries	Congo, Rep.	2017	-4.38253	69.73	30.27	1.05856
Least Developed Countries	Congo, Rep.	2018	-4.80535	69.34	30.66	1.23752
Least Developed Countries	Congo, Rep.	2019	-0.086886	68.67	31.33	1.34932
Developing Countries	Costa Rica	1990	3.55306	45.3808	54.6192	0.920038
Developing Countries	Costa Rica	1991	2.26565	44.6895	55.3105	0.955628
Developing Countries	Costa Rica	1992	9.2011	35.0279	64.9721	1.26273
Developing Countries	Costa Rica	1993	7.09719	36.2592	63.7408	1.23951
Developing Countries	Costa Rica	1994	4.51903	35.8015	64.1985	1.40221
Developing Countries	Costa Rica	1995	4.15395	34.9736	65.0264	1.35664
Developing Countries	Costa Rica	1996	1.35046	36.6542	63.3458	1.24712
Developing Countries	Costa Rica	1997	5.47617	33.5639	66.4361	1.20733
Developing Countries	Costa Rica	1998	7.15531	28.8905	71.1095	1.3197
Developing Countries	Costa Rica	1999	4.21481	29.8905	70.1095	1.29458
Developing Countries	Costa Rica	2000	3.86872	32.95	67.05	1.24925
Developing Countries	Costa Rica	2001	3.49117	32.11	67.89	1.34355
Developing Countries	Costa Rica	2002	3.41688	32.54	67.46	1.34604
Developing Countries	Costa Rica	2003	4.31718	33.3	66.7	1.39287
Developing Countries	Costa Rica	2004	4.4246	39.16	60.84	1.40587
Developing Countries	Costa Rica	2005	3.97667	41.73	58.27	1.46307
Developing Countries	Costa Rica	2006	7.3267	42.4	57.6	1.50964
Developing Countries	Costa Rica	2007	8.21513	41.19	58.81	1.72546
Developing Countries	Costa Rica	2008	4.73817	40.7	59.3	1.68492
Developing Countries	Costa Rica	2009	-0.873456	40.72	59.28	1.59266
Developing Countries	Costa Rica	2010	5.36034	40.39	59.61	1.55329
Developing Countries	Costa Rica	2011	4.40316	38.02	61.98	1.60368
Developing Countries	Costa Rica	2012	4.88259	38.06	61.94	1.58916
Developing Countries	Costa Rica	2013	2.49477	37.8	62.2	1.64062
Developing Countries	Costa Rica	2014	3.54211	37.62	62.38	1.63282
Developing Countries	Costa Rica	2015	3.65208	38.33	61.67	1.55534
Developing Countries	Costa Rica	2016	4.20432	36.81	63.19	1.6492
Developing Countries	Costa Rica	2017	4.1577	36.2	63.8	1.6687
Developing Countries	Costa Rica	2018	2.6159	35.7	64.3	1.67419
Developing Countries	Costa Rica	2019	2.41751	35.76	64.24	1.63247
Developing Countries	Cote d'Ivoire	1990	-1.09591	73.5823	26.4177	0.227256
Developing Countries	Cote d'Ivoire	1991	0.0409252	74.0157	25.9843	0.225684
Developing Countries	Cote d'Ivoire	1992	-0.244561	74.5587	25.4413	0.216196
Developing Countries	Cote d'Ivoire	1993	-0.192485	75.1267	24.8733	0.223032
Developing Countries	Cote d'Ivoire	1994	0.811207	75.6065	24.3935	0.224966
Developing Countries	Cote d'Ivoire	1995	7.12574	74.8826	25.1174	0.237328
Developing Countries	Cote d'Ivoire	1996	7.72933	74.0417	25.9583	0.276165
Developing Countries	Cote d'Ivoire	1997	9.64884	72.1351	27.8649	0.328472
Developing Countries	Cote d'Ivoire	1998	4.26391	73.4473	26.5527	0.320089
Developing Countries	Cote d'Ivoire	1999	1.16686	61.9308	38.0692	0.426008
Developing Countries	Cote d'Ivoire	2000	-0.265789	63.72	36.28	0.394417
Developing Countries	Cote d'Ivoire	2001	-2.15401	64.73	35.27	0.385094
Developing Countries	Cote d'Ivoire	2002	-2.73053	65.32	34.68	0.396947
Developing Countries	Cote d'Ivoire	2003	-4.72587	70.32	29.68	0.301711
Developing Countries	Cote d'Ivoire	2004	3.18504	75.4	24.6	0.304388
Developing Countries	Cote d'Ivoire	2005	0.996066	77.92	22.08	0.320357
Developing Countries	Cote d'Ivoire	2006	2.81558	74.79	25.21	0.30392
Developing Countries	Cote d'Ivoire	2007	1.10143	76.33	23.67	0.295234
Developing Countries	Cote d'Ivoire	2008	4.78267	74.21	25.79	0.330008
Developing Countries	Cote d'Ivoire	2009	3.60332	73.71	26.29	0.300611
Developing Countries	Cote d'Ivoire	2010	6.84805	75.42	24.58	0.309259
Developing Countries	Cote d'Ivoire	2011	-5.37045	79.11	20.89	0.291031
Developing Countries	Cote d'Ivoire	2012	7.62041	74.9	25.1	0.373135
Developing Countries	Cote d'Ivoire	2013	10.7602	72.16	27.84	0.393435
Developing Countries	Cote d'Ivoire	2014	9.372	71.91	28.09	0.406223
Developing Countries	Cote d'Ivoire	2015	7.19409	64.51	35.49	0.422369
Developing Countries	Cote d'Ivoire	2016	7.17921	64.04	35.96	0.402557
Developing Countries	Cote d'Ivoire	2017	7.35964	62.54	37.46	0.432123
Developing Countries	Cote d'Ivoire	2018	6.89028	62.99	37.01	0.406474
Developing Countries	Cote d'Ivoire	2019	6.23171	62.46	37.54	0.42113
Developing Countries	Cuba	1990	-2.94856	42.8902	57.1098	3.36133
Developing Countries	Cuba	1991	-10.6927	47.1742	52.8258	2.56897
Developing Countries	Cuba	1992	-11.5806	51.3106	48.6894	2.02768
Developing Countries	Cuba	1993	-14.8782	46.8679	53.1321	1.86759
Developing Countries	Cuba	1994	0.71693	45.777	54.223	2.00397
Developing Countries	Cuba	1995	2.4572	41.2546	58.7454	2.1289
Developing Countries	Cuba	1996	7.83875	41.4291	58.5709	2.30362
Developing Countries	Cuba	1997	2.78343	36.8181	63.1819	2.49779
Developing Countries	Cuba	1998	0.159146	34.8227	65.1773	2.4559
Developing Countries	Cuba	1999	6.18876	33.7191	66.2809	2.52601
Developing Countries	Cuba	2000	5.91476	34.43	65.57	2.54799
Developing Countries	Cuba	2001	3.18503	34.05	65.95	2.46044
Developing Countries	Cuba	2002	1.42482	34.8	65.2	2.359
Developing Countries	Cuba	2003	3.79274	33.56	66.44	2.28245
Developing Countries	Cuba	2004	5.77054	33.77	66.23	2.25415
Developing Countries	Cuba	2005	11.2017	26.31	73.69	2.33715
Developing Countries	Cuba	2006	12.0659	21.96	78.04	2.37807
Developing Countries	Cuba	2007	7.26214	18.59	81.41	2.4602
Developing Countries	Cuba	2008	4.11683	18.73	81.27	2.38053
Developing Countries	Cuba	2009	1.45131	18.97	81.03	2.4032
Developing Countries	Cuba	2010	2.39035	15.61	84.39	2.50405
Developing Countries	Cuba	2011	2.8023	19.2	80.8	2.45535
Developing Countries	Cuba	2012	3.0149	19.38	80.62	2.54861
Developing Countries	Cuba	2013	2.7476	18.24	81.76	2.55878
Developing Countries	Cuba	2014	1.04758	23.16	76.84	2.3605
Developing Countries	Cuba	2015	4.43814	21.15	78.85	2.5793
Developing Countries	Cuba	2016	0.513761	19.2	80.8	2.39698
Developing Countries	Cuba	2017	1.80905	22	78	2.31408
Developing Countries	Cuba	2018	2.24848	24.11	75.89	2.35576
Developing Countries	Cuba	2019	-0.16484	21.54	78.46	2.28615
Developed Countries	Cyprus	1990	7.404	0.495929	99.5041	5.98735
Developed Countries	Cyprus	1991	0.739501	0.36581	99.6342	6.52517
Developed Countries	Cyprus	1992	9.4	0.347099	99.6529	6.84478
Developed Countries	Cyprus	1993	0.7	0.33486	99.6651	7.01069
Developed Countries	Cyprus	1994	5.9	0.723187	99.2768	7.14368
Developed Countries	Cyprus	1995	8.36247	3.3543	96.6457	6.83898
Developed Countries	Cyprus	1996	1.24858	3.35707	96.6429	7.10993
Developed Countries	Cyprus	1997	2.64089	3.29407	96.7059	7.0692
Developed Countries	Cyprus	1998	6.11085	3.26217	96.7378	7.27405
Developed Countries	Cyprus	1999	4.99796	3.22664	96.7734	7.41861
Developed Countries	Cyprus	2000	5.96531	3.08	96.92	7.55867
Developed Countries	Cyprus	2001	3.95256	3.03	96.97	7.27917
Developed Countries	Cyprus	2002	3.72296	3.16	96.84	7.33903
Developed Countries	Cyprus	2003	2.62329	3.24	96.76	7.88074
Developed Countries	Cyprus	2004	5.02634	3.29	96.71	7.69984
Developed Countries	Cyprus	2005	4.853	3.34	96.66	7.68739
Developed Countries	Cyprus	2006	4.71383	3.5	96.5	7.65178
Developed Countries	Cyprus	2007	5.09807	4.33	95.67	7.81229
Developed Countries	Cyprus	2008	3.64681	5.47	94.53	7.84971
Developed Countries	Cyprus	2009	-2.01526	6.31	93.69	7.54037
Developed Countries	Cyprus	2010	2.0147	6.55	93.45	7.10038
Developed Countries	Cyprus	2011	0.401438	7.66	92.34	6.78321
Developed Countries	Cyprus	2012	-3.44682	8.69	91.31	6.25525
Developed Countries	Cyprus	2013	-6.55308	9.83	90.17	5.62129
Developed Countries	Cyprus	2014	-1.82931	9.59	90.41	5.90993
Developed Countries	Cyprus	2015	3.38308	10.51	89.49	5.90015
Developed Countries	Cyprus	2016	6.45455	10.36	89.64	6.16994
Developed Countries	Cyprus	2017	5.85254	11.03	88.97	6.23895
Developed Countries	Cyprus	2018	5.69284	12.11	87.89	6.05417
Developed Countries	Cyprus	2019	5.28319	12.05	87.95	5.9988
Developed Countries	Denmark	1990	1.47524	7.04156	92.9584	10.1324
Developed Countries	Denmark	1991	1.39363	7.0709	92.9291	12.184
Developed Countries	Denmark	1992	1.95701	7.74745	92.2526	11.028
Developed Countries	Denmark	1993	0.0106876	7.7015	92.2985	11.4404
Developed Countries	Denmark	1994	5.33246	7.3304	92.6696	12.1394
Developed Countries	Denmark	1995	3.02759	7.51218	92.4878	11.4649
Developed Countries	Denmark	1996	2.9001	7.26118	92.7388	13.9348
Developed Countries	Denmark	1997	3.26089	8.10273	91.8973	12.0435
Developed Countries	Denmark	1998	2.21816	8.51784	91.4822	11.2571
Developed Countries	Denmark	1999	2.94802	9.06635	90.9336	10.6599
Developed Countries	Denmark	2000	3.74686	10.73	89.27	9.8509
Developed Countries	Denmark	2001	0.823153	11.12	88.88	10.1236
Developed Countries	Denmark	2002	0.466346	11.86	88.14	10.015
Developed Countries	Denmark	2003	0.390059	12.72	87.28	10.9877
Developed Countries	Denmark	2004	2.66822	14.44	85.56	9.94167
Developed Countries	Denmark	2005	2.33664	16.12	83.88	9.26296
Developed Countries	Denmark	2006	3.91301	15.26	84.74	10.691
Developed Countries	Denmark	2007	0.909239	17.69	82.31	9.77948
Developed Countries	Denmark	2008	-0.512017	18.54	81.46	9.12513
Developed Countries	Denmark	2009	-4.90655	19.33	80.67	8.67811
Developed Countries	Denmark	2010	1.87099	21.2	78.8	8.67389
Developed Countries	Denmark	2011	1.33678	23.83	76.17	7.73709
Developed Countries	Denmark	2012	0.2265	26.93	73.07	6.83529
Developed Countries	Denmark	2013	0.933341	27.05	72.95	7.11674
Developed Countries	Denmark	2014	1.61939	30.18	69.82	6.34715
Developed Countries	Denmark	2015	2.34259	32.89	67.11	5.92946
Developed Countries	Denmark	2016	3.24596	32.17	67.83	6.16619
Developed Countries	Denmark	2017	2.82174	35.2	64.8	5.74677
Developed Countries	Denmark	2018	1.98954	34.67	65.33	5.71834
Developed Countries	Denmark	2019	2.11466	37.52	62.48	5.10799
Developing Countries	Dominica	1990	5.41798	14.6031	85.3969	0.852006
Developing Countries	Dominica	1991	1.34776	14.5052	85.4948	0.852551
Developing Countries	Dominica	1992	2.02942	14.4936	85.5064	1.13401
Developing Countries	Dominica	1993	2.16141	13.6305	86.3695	1.12966
Developing Countries	Dominica	1994	0.0344815	13.5271	86.4729	1.12606
Developing Countries	Dominica	1995	3.03086	15.6474	84.3526	1.40637
Developing Countries	Dominica	1996	3.1042	20.8483	79.1517	1.12782
Developing Countries	Dominica	1997	2.18563	15.5173	84.4827	1.41659
Developing Countries	Dominica	1998	3.77423	15.0051	84.9949	1.56733
Developing Countries	Dominica	1999	0.354079	14.0768	85.9232	1.5753
Developing Countries	Dominica	2000	2.34022	11.06	88.94	1.86648
Developing Countries	Dominica	2001	-0.0638447	9.41	90.59	2.15298
Developing Countries	Dominica	2002	-2.828	13.6	86.4	1.71821
Developing Countries	Dominica	2003	6.35314	10.56	89.44	1.99709
Developing Countries	Dominica	2004	3.05069	11.56	88.44	2.27315
Developing Countries	Dominica	2005	0.655862	10.8	89.2	2.26693
Developing Countries	Dominica	2006	4.65946	9.88	90.12	2.40391
Developing Countries	Dominica	2007	6.35297	8.68	91.32	2.54248
Developing Countries	Dominica	2008	7.12106	8.45	91.55	2.54133
Developing Countries	Dominica	2009	-1.16959	9.23	90.77	7.05736
Developing Countries	Dominica	2010	0.672634	10.28	89.72	2.53961
Developing Countries	Dominica	2011	-0.223551	13.8	86.2	2.53836
Developing Countries	Dominica	2012	-1.059	11.33	88.67	3.52341
Developing Countries	Dominica	2013	-0.999941	11.57	88.43	2.39373
Developing Countries	Dominica	2014	4.75379	9.97	90.03	2.53197
Developing Countries	Dominica	2015	-2.7315	8.8	91.2	2.52898
Developing Countries	Dominica	2016	2.76365	10.88	89.12	2.5243
Developing Countries	Dominica	2017	-6.61899	9.84	90.16	2.37895
Developing Countries	Dominica	2018	3.54758	8.3	91.7	2.37344
Developing Countries	Dominica	2019	5.50248	8.05	91.95	2.36742
Developing Countries	Dominican Republic	1990	-5.45431	28.0116	71.9884	1.10184
Developing Countries	Dominican Republic	1991	0.944139	28.1632	71.8368	1.13199
Developing Countries	Dominican Republic	1992	11.2209	25.3569	74.6431	1.29854
Developing Countries	Dominican Republic	1993	7.36451	26.8481	73.1519	1.26152
Developing Countries	Dominican Republic	1994	2.60035	24.439	75.561	1.44982
Developing Countries	Dominican Republic	1995	5.68543	22.3363	77.6637	1.51421
Developing Countries	Dominican Republic	1996	5.97783	20.3109	79.6891	1.6007
Developing Countries	Dominican Republic	1997	8.88527	18.2511	81.7489	1.79358
Developing Countries	Dominican Republic	1998	6.71448	19.7511	80.2489	2.02327
Developing Countries	Dominican Republic	1999	5.94005	19.5373	80.4627	2.13225
Developing Countries	Dominican Republic	2000	4.66176	19.11	80.89	2.20391
Developing Countries	Dominican Republic	2001	2.45952	18.89	81.11	2.20734
Developing Countries	Dominican Republic	2002	4.4951	17.94	82.06	2.39313
Developing Countries	Dominican Republic	2003	-1.34571	18.94	81.06	2.11631
Developing Countries	Dominican Republic	2004	2.57013	20.67	79.33	1.92547
Developing Countries	Dominican Republic	2005	9.42824	19.44	80.56	2.05446
Developing Countries	Dominican Republic	2006	9.17436	17.98	82.02	2.20964
Developing Countries	Dominican Republic	2007	7.41595	17.89	82.11	2.20905
Developing Countries	Dominican Republic	2008	3.2095	17.68	82.32	2.17592
Developing Countries	Dominican Republic	2009	0.946155	17.34	82.66	2.05289
Developing Countries	Dominican Republic	2010	8.33965	16.91	83.09	2.13303
Developing Countries	Dominican Republic	2011	3.13342	16.75	83.25	2.1308
Developing Countries	Dominican Republic	2012	2.71737	16.48	83.52	2.18308
Developing Countries	Dominican Republic	2013	4.87521	16.55	83.45	2.11878
Developing Countries	Dominican Republic	2014	7.05046	17.28	82.72	2.11014
Developing Countries	Dominican Republic	2015	6.92702	14.88	85.12	2.29437
Developing Countries	Dominican Republic	2016	6.6592	15.31	84.69	2.36494
Developing Countries	Dominican Republic	2017	4.6667	16.87	83.13	2.24006
Developing Countries	Dominican Republic	2018	6.98253	15.95	84.05	2.38164
Developing Countries	Dominican Republic	2019	5.05217	13.98	86.02	2.53563
Developing Countries	Ecuador	1990	3.67991	24.1985	75.8015	1.50719
Developing Countries	Ecuador	1991	4.29134	24.1631	75.8369	1.50299
Developing Countries	Ecuador	1992	2.11431	20.8004	79.1996	1.5724
Developing Countries	Ecuador	1993	1.97322	21.6185	78.3815	1.54633
Developing Countries	Ecuador	1994	4.25825	20.8532	79.1468	1.67737
Developing Countries	Ecuador	1995	2.25255	20.3541	79.6459	1.82624
Developing Countries	Ecuador	1996	1.73175	19.2915	80.7085	2.05073
Developing Countries	Ecuador	1997	4.32786	16.5428	83.4572	2.08761
Developing Countries	Ecuador	1998	3.26653	18.1907	81.8093	2.00599
Developing Countries	Ecuador	1999	-4.73939	21.0558	78.9442	1.73684
Developing Countries	Ecuador	2000	1.0918	19.43	80.57	1.7388
Developing Countries	Ecuador	2001	4.01563	17.05	82.95	1.87771
Developing Countries	Ecuador	2002	4.09678	17.1	82.9	1.83894
Developing Countries	Ecuador	2003	2.72288	16.55	83.45	1.84447
Developing Countries	Ecuador	2004	8.21102	16.73	83.27	1.92551
Developing Countries	Ecuador	2005	5.29131	16.16	83.84	2.04111
Developing Countries	Ecuador	2006	4.40353	14.19	85.81	2.14305
Developing Countries	Ecuador	2007	2.19006	15.88	84.12	2.14317
Developing Countries	Ecuador	2008	6.35713	15.32	84.68	2.18014
Developing Countries	Ecuador	2009	0.566492	12.87	87.13	2.33512
Developing Countries	Ecuador	2010	3.5253	11.79	88.21	2.48149
Developing Countries	Ecuador	2011	7.86814	13.15	86.85	2.43376
Developing Countries	Ecuador	2012	5.64196	13.2	86.8	2.39691
Developing Countries	Ecuador	2013	4.94651	11.85	88.15	2.52746
Developing Countries	Ecuador	2014	3.78887	12.18	87.82	2.62039
Developing Countries	Ecuador	2015	0.0988726	13.07	86.93	2.56106
Developing Countries	Ecuador	2016	-1.22638	14.75	85.25	2.41403
Developing Countries	Ecuador	2017	2.36839	17.05	82.95	2.29664
Developing Countries	Ecuador	2018	1.28929	16.33	83.67	2.34952
Developing Countries	Ecuador	2019	0.0121051	17.73	82.27	2.26147
Developing Countries	Egypt, Arab Rep.	1990	5.66703	8.50247	91.4975	1.56321
Developing Countries	Egypt, Arab Rep.	1991	1.1254	9.05203	90.948	1.5563
Developing Countries	Egypt, Arab Rep.	1992	4.47286	8.71506	91.2849	1.54943
Developing Countries	Egypt, Arab Rep.	1993	2.90079	8.83928	91.1607	1.54741
Developing Countries	Egypt, Arab Rep.	1994	3.97317	9.82897	90.171	1.43872
Developing Countries	Egypt, Arab Rep.	1995	4.64246	9.00303	90.997	1.50351
Developing Countries	Egypt, Arab Rep.	1996	4.98873	8.67808	91.3219	1.55562
Developing Countries	Egypt, Arab Rep.	1997	5.49235	8.34474	91.6553	1.6344
Developing Countries	Egypt, Arab Rep.	1998	5.5755	8.2485	91.7515	1.67643
Developing Countries	Egypt, Arab Rep.	1999	6.05344	8.55974	91.4403	1.72612
Developing Countries	Egypt, Arab Rep.	2000	6.37	8.26	91.74	1.66508
Developing Countries	Egypt, Arab Rep.	2001	3.53525	7.82	92.18	1.80606
Developing Countries	Egypt, Arab Rep.	2002	2.3902	7.35	92.65	1.81073
Developing Countries	Egypt, Arab Rep.	2003	3.19345	7.45	92.55	1.82654
Developing Countries	Egypt, Arab Rep.	2004	4.09207	7.57	92.43	1.94817
Developing Countries	Egypt, Arab Rep.	2005	4.47174	6.48	93.52	2.14794
Developing Countries	Egypt, Arab Rep.	2006	6.84384	6.22	93.78	2.22118
Developing Countries	Egypt, Arab Rep.	2007	7.08783	6.05	93.95	2.34431
Developing Countries	Egypt, Arab Rep.	2008	7.15628	6.17	93.83	2.3851
Developing Countries	Egypt, Arab Rep.	2009	4.6736	5.9	94.1	2.43619
Developing Countries	Egypt, Arab Rep.	2010	5.14723	5.57	94.43	2.42034
Developing Countries	Egypt, Arab Rep.	2011	1.76457	5.53	94.47	2.43431
Developing Countries	Egypt, Arab Rep.	2012	2.2262	5.5	94.5	2.48779
Developing Countries	Egypt, Arab Rep.	2013	2.18547	5.49	94.51	2.4191
Developing Countries	Egypt, Arab Rep.	2014	2.91591	5.59	94.41	2.42323
Developing Countries	Egypt, Arab Rep.	2015	4.37202	5.45	94.55	2.44779
Developing Countries	Egypt, Arab Rep.	2016	4.34664	5.31	94.69	2.44825
Developing Countries	Egypt, Arab Rep.	2017	4.18122	5.1	94.9	2.51165
Developing Countries	Egypt, Arab Rep.	2018	5.31412	5.23	94.77	2.51881
Developing Countries	Egypt, Arab Rep.	2019	5.55768	5.3	94.7	2.48406
Developing Countries	El Salvador	1990	4.8329	67.137	32.863	0.451607
Developing Countries	El Salvador	1991	1.49409	64.7259	35.2741	0.574671
Developing Countries	El Salvador	1992	7.02196	61.6888	38.3112	0.6185
Developing Countries	El Salvador	1993	5.81832	59.3421	40.6579	0.713963
Developing Countries	El Salvador	1994	4.69206	57.1983	42.8017	0.801882
Developing Countries	El Salvador	1995	4.73408	54.747	45.253	0.881213
Developing Countries	El Salvador	1996	0.811462	56.9374	43.0626	0.771537
Developing Countries	El Salvador	1997	3.13797	53.0624	46.9376	0.925815
Developing Countries	El Salvador	1998	2.65228	51.5866	48.4134	0.977963
Developing Countries	El Salvador	1999	2.16203	51.0076	48.9924	0.959822
Developing Countries	El Salvador	2000	1.12791	33.51	66.49	0.956193
Developing Countries	El Salvador	2001	0.879614	33.11	66.89	0.990383
Developing Countries	El Salvador	2002	1.57292	34.02	65.98	0.996287
Developing Countries	El Salvador	2003	1.56539	33.85	66.15	1.08607
Developing Countries	El Salvador	2004	0.889404	33.33	66.67	1.10893
Developing Countries	El Salvador	2005	2.7104	34.08	65.92	1.13018
Developing Countries	El Salvador	2006	4.34481	34.76	65.24	1.19091
Developing Countries	El Salvador	2007	1.8597	28.24	71.76	1.24963
Developing Countries	El Salvador	2008	2.1267	31.5	68.5	1.12692
Developing Countries	El Salvador	2009	-2.08732	32.2	67.8	1.08482
Developing Countries	El Salvador	2010	2.10674	32.62	67.38	1.05759
Developing Countries	El Salvador	2011	3.81706	29.52	70.48	1.09169
Developing Countries	El Salvador	2012	2.8155	30.27	69.73	1.0853
Developing Countries	El Salvador	2013	2.23214	27.54	72.46	1.03095
Developing Countries	El Salvador	2014	1.71071	23.95	76.05	1.04684
Developing Countries	El Salvador	2015	2.39897	21.03	78.97	1.1067
Developing Countries	El Salvador	2016	2.54593	20.71	79.29	1.12804
Developing Countries	El Salvador	2017	2.24667	24.99	75.01	0.998728
Developing Countries	El Salvador	2018	2.43229	23.21	76.79	1.06063
Developing Countries	El Salvador	2019	2.38258	19.39	80.61	1.20864
Developing Countries	Equatorial Guinea	1990	-1.75856	84.7109	15.2891	0.143134
Developing Countries	Equatorial Guinea	1991	-1.02224	83.9597	16.0403	0.161721
Developing Countries	Equatorial Guinea	1992	34.7453	84.0068	15.9932	2.01221
Developing Countries	Equatorial Guinea	1993	11.0332	84.4589	15.5411	2.07506
Developing Countries	Equatorial Guinea	1994	16.6688	83.6896	16.3104	2.14987
Developing Countries	Equatorial Guinea	1995	17.4863	82.4829	17.5171	2.21431
Developing Countries	Equatorial Guinea	1996	66.58	76.7482	23.2518	2.3069
Developing Countries	Equatorial Guinea	1997	149.973	66.0291	33.9709	3.07572
Developing Countries	Equatorial Guinea	1998	23.7745	68.0176	31.9824	3.52733
Developing Countries	Equatorial Guinea	1999	25.664	61.819	38.181	5.55207
Developing Countries	Equatorial Guinea	2000	18.2138	45.85	54.15	3.66228
Developing Countries	Equatorial Guinea	2001	63.3799	46.12	53.88	5.38263
Developing Countries	Equatorial Guinea	2002	19.4628	31.31	68.69	7.03233
Developing Countries	Equatorial Guinea	2003	13.9553	29.49	70.51	7.29608
Developing Countries	Equatorial Guinea	2004	37.9987	7.2	92.8	8.64776
Developing Countries	Equatorial Guinea	2005	16.7487	7.1	92.9	11.1003
Developing Countries	Equatorial Guinea	2006	7.70492	6.99	93.01	11.944
Developing Countries	Equatorial Guinea	2007	15.2821	8.49	91.51	10.3933
Developing Countries	Equatorial Guinea	2008	17.7991	7.23	92.77	11.361
Developing Countries	Equatorial Guinea	2009	1.34336	9.24	90.76	10.7699
Developing Countries	Equatorial Guinea	2010	-8.92418	5.74	94.26	10.5443
Developing Countries	Equatorial Guinea	2011	6.52392	5.58	94.42	10.123
Developing Countries	Equatorial Guinea	2012	8.31287	4.42	95.58	9.52297
Developing Countries	Equatorial Guinea	2013	-4.1332	3.68	96.32	8.52833
Developing Countries	Equatorial Guinea	2014	0.415066	4.2	95.8	7.0482
Developing Countries	Equatorial Guinea	2015	-9.11004	4.56	95.44	5.62223
Developing Countries	Equatorial Guinea	2016	-8.81642	3.95	96.05	5.48066
Developing Countries	Equatorial Guinea	2017	-5.6675	3.54	96.46	4.59585
Developing Countries	Equatorial Guinea	2018	-6.23655	4.91	95.09	4.91227
Developing Countries	Equatorial Guinea	2019	-5.48182	6.58	93.42	3.94548
Developing Countries	Eswatini	1990	21.018	85.2457	14.7543	0.680915
Developing Countries	Eswatini	1991	1.76038	86.6709	13.3291	0.662513
Developing Countries	Eswatini	1992	3.22621	92.263	7.737	0.668977
Developing Countries	Eswatini	1993	3.10611	91.9937	8.00629	0.664634
Developing Countries	Eswatini	1994	2.40069	73.2135	26.7865	0.672086
Developing Countries	Eswatini	1995	4.82565	72.7563	27.2437	0.679732
Developing Countries	Eswatini	1996	3.84205	75.5024	24.4976	0.486512
Developing Countries	Eswatini	1997	3.10281	47.9277	52.0723	0.612404
Developing Countries	Eswatini	1998	2.60404	49.1073	50.8927	0.632703
Developing Countries	Eswatini	1999	2.95088	48.8656	51.1344	0.684032
Developing Countries	Eswatini	2000	1.76017	59.39	40.61	0.686272
Developing Countries	Eswatini	2001	1.05476	61.24	38.76	0.601811
Developing Countries	Eswatini	2002	4.3801	63.65	36.35	0.608407
Developing Countries	Eswatini	2003	3.88021	65.59	34.41	0.615959
Developing Countries	Eswatini	2004	3.62391	65.64	34.36	0.613863
Developing Countries	Eswatini	2005	5.99878	66.56	33.44	0.640419
Developing Countries	Eswatini	2006	5.99217	71.42	28.58	0.627356
Developing Countries	Eswatini	2007	4.43538	71.35	28.65	0.633002
Developing Countries	Eswatini	2008	0.821664	72.68	27.32	0.60003
Developing Countries	Eswatini	2009	1.56505	70.83	29.17	0.661962
Developing Countries	Eswatini	2010	3.79375	72.39	27.61	0.61042
Developing Countries	Eswatini	2011	2.24723	72.52	27.48	0.615655
Developing Countries	Eswatini	2012	5.39663	71.41	28.59	0.630047
Developing Countries	Eswatini	2013	3.86121	69.7	30.3	0.690072
Developing Countries	Eswatini	2014	0.923231	71.67	28.33	0.684918
Developing Countries	Eswatini	2015	2.22748	71.68	28.32	0.69744
Developing Countries	Eswatini	2016	1.06261	69.61	30.39	0.754044
Developing Countries	Eswatini	2017	2.02658	65.54	34.46	0.791246
Developing Countries	Eswatini	2018	2.38296	66.07	33.93	0.800863
Developing Countries	Eswatini	2019	2.60166	65.95	34.05	0.83614
Least Developed Countries	Ethiopia	1990	2.72645	96.6354	3.36461	0.0482377
Least Developed Countries	Ethiopia	1991	-7.13748	96.7113	3.28871	0.0469664
Least Developed Countries	Ethiopia	1992	-8.67248	97.7404	2.25959	0.0295584
Least Developed Countries	Ethiopia	1993	13.1428	97.1987	2.80134	0.0364008
Least Developed Countries	Ethiopia	1994	3.18996	96.8839	3.11611	0.0409561
Least Developed Countries	Ethiopia	1995	6.12751	96.6201	3.37986	0.0450499
Least Developed Countries	Ethiopia	1996	12.4262	96.352	3.64802	0.0487403
Least Developed Countries	Ethiopia	1997	3.13391	96.2209	3.77914	0.050414
Least Developed Countries	Ethiopia	1998	-3.45814	96.1002	3.89976	0.0516736
Least Developed Countries	Ethiopia	1999	5.16215	96.1895	3.81051	0.0494226
Least Developed Countries	Ethiopia	2000	6.07322	95.55	4.45	0.0537563
Least Developed Countries	Ethiopia	2001	8.30131	94.6	5.4	0.0645545
Least Developed Countries	Ethiopia	2002	1.51473	94.53	5.47	0.0651535
Least Developed Countries	Ethiopia	2003	-2.16136	94.23	5.77	0.0695574
Least Developed Countries	Ethiopia	2004	13.5726	94.13	5.87	0.0717947
Least Developed Countries	Ethiopia	2005	11.8188	94.73	5.27	0.066146
Least Developed Countries	Ethiopia	2006	10.8347	94.54	5.46	0.0687993
Least Developed Countries	Ethiopia	2007	11.4562	94.16	5.84	0.0738773
Least Developed Countries	Ethiopia	2008	10.7885	94.09	5.91	0.0782718
Least Developed Countries	Ethiopia	2009	8.80255	94.18	5.82	0.0766127
Least Developed Countries	Ethiopia	2010	12.5505	94.11	5.89	0.0738248
Least Developed Countries	Ethiopia	2011	11.1783	93.56	6.44	0.0836477
Least Developed Countries	Ethiopia	2012	8.64781	93.3	6.7	0.0914513
Least Developed Countries	Ethiopia	2013	10.5823	92.49	7.51	0.105676
Least Developed Countries	Ethiopia	2014	10.2575	91.25	8.75	0.125797
Least Developed Countries	Ethiopia	2015	10.3925	91.56	8.44	0.127832
Least Developed Countries	Ethiopia	2016	9.43348	90.49	9.51	0.144493
Least Developed Countries	Ethiopia	2017	9.56419	90.22	9.78	0.148684
Least Developed Countries	Ethiopia	2018	6.81615	89.42	10.58	0.15784
Least Developed Countries	Ethiopia	2019	8.36409	88.92	11.08	0.163813
Developing Countries	Fiji	1990	5.8	53.094	46.906	0.947054
Developing Countries	Fiji	1991	-2.7	60.0666	39.9334	0.924669
Developing Countries	Fiji	1992	6.1	58.5857	41.4143	0.967131
Developing Countries	Fiji	1993	2.13003	59.0061	40.9939	0.927199
Developing Countries	Fiji	1994	5.1	63.7767	36.2233	0.914307
Developing Countries	Fiji	1995	2.5	60.0612	39.9388	0.915623
Developing Countries	Fiji	1996	4.8	59.7141	40.2859	0.981656
Developing Countries	Fiji	1997	-2.2	54.962	45.038	0.946091
Developing Countries	Fiji	1998	1.3	49.7926	50.2074	0.912331
Developing Countries	Fiji	1999	8.8	56.0545	43.9455	0.930173
Developing Countries	Fiji	2000	-1.7	50.06	49.94	0.998753
Developing Countries	Fiji	2001	2	40.44	59.56	1.27776
Developing Countries	Fiji	2002	3.2	48.98	51.02	1.07941
Developing Countries	Fiji	2003	0.999999	40.83	59.17	1.28664
Developing Countries	Fiji	2004	5.3	35.72	64.28	1.79736
Developing Countries	Fiji	2005	0.7	40.02	59.98	1.5701
Developing Countries	Fiji	2006	1.85248	39.07	60.93	1.66693
Developing Countries	Fiji	2007	-0.850654	36.04	63.96	1.50684
Developing Countries	Fiji	2008	1.03279	40.89	59.11	1.14745
Developing Countries	Fiji	2009	-1.38604	40.09	59.91	1.13632
Developing Countries	Fiji	2010	2.95467	26.49	73.51	1.34913
Developing Countries	Fiji	2011	2.70514	31.15	68.85	1.28554
Developing Countries	Fiji	2012	1.41131	31.73	68.27	1.19066
Developing Countries	Fiji	2013	4.73422	32.81	67.19	1.30545
Developing Countries	Fiji	2014	5.60351	33.17	66.83	1.48884
Developing Countries	Fiji	2015	4.5012	32.74	67.26	1.5887
Developing Countries	Fiji	2016	2.44565	27.68	72.32	1.74231
Developing Countries	Fiji	2017	5.35336	28.55	71.45	1.88043
Developing Countries	Fiji	2018	3.81235	25.8	74.2	1.84496
Developing Countries	Fiji	2019	-0.445563	26.48	73.52	1.83155
Developed Countries	Finland	1990	0.670276	24.5084	75.4916	10.9417
Developed Countries	Finland	1991	-5.88633	24.027	75.973	10.9958
Developed Countries	Finland	1992	-3.29466	25.1234	74.8766	10.3689
Developed Countries	Finland	1993	-0.661998	26.0035	73.9965	10.5518
Developed Countries	Finland	1994	3.96305	25.1319	74.8681	11.7779
Developed Countries	Finland	1995	4.21687	27.2664	72.7336	10.9813
Developed Countries	Finland	1996	3.66718	26.8706	73.1294	12.2098
Developed Countries	Finland	1997	6.3338	28.8284	71.1716	11.7942
Developed Countries	Finland	1998	5.45718	30.498	69.502	11.1128
Developed Countries	Finland	1999	4.37958	30.2361	69.7639	10.9399
Developed Countries	Finland	2000	5.77336	31.68	68.32	10.6449
Developed Countries	Finland	2001	2.61002	29.25	70.75	11.7752
Developed Countries	Finland	2002	1.70715	29.52	70.48	12.1986
Developed Countries	Finland	2003	2.00378	28.35	71.65	13.756
Developed Countries	Finland	2004	3.99209	31.1	68.9	12.9453
Developed Countries	Finland	2005	2.77985	31.52	68.48	10.5717
Developed Countries	Finland	2006	4.02741	31.25	68.75	12.7263
Developed Countries	Finland	2007	5.29934	31.8	68.2	12.3092
Developed Countries	Finland	2008	0.783995	34.61	65.39	10.6636
Developed Countries	Finland	2009	-8.07445	32.46	67.54	10.1482
Developed Countries	Finland	2010	3.18596	33.43	66.57	11.6588
Developed Countries	Finland	2011	2.54766	35.14	64.86	10.2296
Developed Countries	Finland	2012	-1.39755	38.72	61.28	9.12639
Developed Countries	Finland	2013	-0.901696	38.52	61.48	9.22785
Developed Countries	Finland	2014	-0.364908	41.25	58.75	8.45187
Developed Countries	Finland	2015	0.543659	43.23	56.77	7.81454
Developed Countries	Finland	2016	2.81146	42.4	57.6	8.31619
Developed Countries	Finland	2017	3.19241	44.48	55.52	7.81015
Developed Countries	Finland	2018	1.14195	44.17	55.83	8.08264
Developed Countries	Finland	2019	1.22075	45.76	54.24	7.37285
Developed Countries	France	1990	2.92394	10.408	89.592	6.11721
Developed Countries	France	1991	1.04818	11.0122	88.9878	6.50025
Developed Countries	France	1992	1.59934	11.2582	88.7418	6.26308
Developed Countries	France	1993	-0.628666	10.8601	89.1399	5.91168
Developed Countries	France	1994	2.35834	10.9345	89.0655	5.80509
Developed Countries	France	1995	2.1067	10.7014	89.2986	5.91583
Developed Countries	France	1996	1.41299	10.495	89.505	6.157
Developed Countries	France	1997	2.3363	9.98545	90.0145	5.98801
Developed Countries	France	1998	3.58866	9.70929	90.2907	6.33217
Developed Countries	France	1999	3.42137	9.77901	90.221	6.19703
Developed Countries	France	2000	3.92367	9.32	90.68	6.12551
Developed Countries	France	2001	1.98372	9.46	90.54	6.13992
Developed Countries	France	2002	1.13553	8.73	91.27	6.00305
Developed Countries	France	2003	0.823161	8.91	91.09	6.05206
Developed Countries	France	2004	2.82975	8.95	91.05	6.02489
Developed Countries	France	2005	1.66322	8.66	91.34	6.02507
Developed Countries	France	2006	2.44932	8.52	91.48	5.84002
Developed Countries	France	2007	2.42474	9.46	90.54	5.66778
Developed Countries	France	2008	0.254946	10.6	89.4	5.56101
Developed Countries	France	2009	-2.87331	11.32	88.68	5.3121
Developed Countries	France	2010	1.94944	11.99	88.01	5.3482
Developed Countries	France	2011	2.1927	10.66	89.34	5.12895
Developed Countries	France	2012	0.313135	12.34	87.66	5.15414
Developed Countries	France	2013	0.576327	13.42	86.58	5.1298
Developed Countries	France	2014	0.956183	13.2	86.8	4.61605
Developed Countries	France	2015	1.11291	13.34	86.66	4.67781
Developed Countries	France	2016	1.09546	14.24	85.76	4.70475
Developed Countries	France	2017	2.29142	14.12	85.88	4.74954
Developed Countries	France	2018	1.86507	15.21	84.79	4.57587
Developed Countries	France	2019	1.84297	15.53	84.47	4.46877
Developing Countries	Gabon	1990	5.19224	78.2807	21.7193	4.31809
Developing Countries	Gabon	1991	6.1125	75.1504	24.8496	4.67316
Developing Countries	Gabon	1992	-3.09015	74.7817	25.2183	4.51837
Developing Countries	Gabon	1993	3.94656	73.8051	26.1949	4.51558
Developing Countries	Gabon	1994	3.71275	72.893	27.107	4.36982
Developing Countries	Gabon	1995	4.97385	71.9439	28.0561	4.80206
Developing Countries	Gabon	1996	3.62505	71.4867	28.5133	5.22039
Developing Countries	Gabon	1997	5.73837	69.9732	30.0268	4.8715
Developing Countries	Gabon	1998	3.47783	69.6697	30.3303	5.46125
Developing Countries	Gabon	1999	-8.93262	71.3413	28.6587	5.02895
Developing Countries	Gabon	2000	-1.88297	72.78	27.22	4.94969
Developing Countries	Gabon	2001	2.13523	72.42	27.58	4.95227
Developing Countries	Gabon	2002	-0.249033	79.82	20.18	4.62622
Developing Countries	Gabon	2003	2.24733	83.63	16.37	4.87899
Developing Countries	Gabon	2004	0.689543	85.78	14.22	4.49849
Developing Countries	Gabon	2005	2.6762	85.25	14.75	4.35799
Developing Countries	Gabon	2006	-2.80658	86.16	13.84	3.80381
Developing Countries	Gabon	2007	6.00811	87.35	12.65	3.35469
Developing Countries	Gabon	2008	-3.30843	87.32	12.68	3.47044
Developing Countries	Gabon	2009	0.130331	88	12	3.31437
Developing Countries	Gabon	2010	7.08989	85.86	14.14	3.54648
Developing Countries	Gabon	2011	7.09175	79.71	20.29	3.43102
Developing Countries	Gabon	2012	5.25108	75.49	24.51	3.20059
Developing Countries	Gabon	2013	5.6387	82.19	17.81	3.18645
Developing Countries	Gabon	2014	4.31496	81.3	18.7	3.16382
Developing Countries	Gabon	2015	3.8789	81.95	18.05	3.14218
Developing Countries	Gabon	2016	2.09144	80.77	19.23	3.1974
Developing Countries	Gabon	2017	0.472642	90.1	9.9	2.58135
Developing Countries	Gabon	2018	0.837917	90.13	9.87	2.41592
Developing Countries	Gabon	2019	3.92081	89.88	10.12	2.41648
Least Developed Countries	Gambia, The	1990	3.55888	61.4419	38.5581	0.198829
Least Developed Countries	Gambia, The	1991	3.10704	61.8017	38.1983	0.201477
Least Developed Countries	Gambia, The	1992	3.37869	62.9356	37.0644	0.194652
Least Developed Countries	Gambia, The	1993	3.0121	62.6798	37.3202	0.197952
Least Developed Countries	Gambia, The	1994	0.154346	60.9835	39.0165	0.191918
Least Developed Countries	Gambia, The	1995	0.881848	59.5777	40.4223	0.194936
Least Developed Countries	Gambia, The	1996	2.22355	59.0748	40.9252	0.188989
Least Developed Countries	Gambia, The	1997	4.9	58.1918	41.8082	0.191583
Least Developed Countries	Gambia, The	1998	3.5	56.9344	43.0656	0.193842
Least Developed Countries	Gambia, The	1999	6.4	55.8153	44.1847	0.203583
Least Developed Countries	Gambia, The	2000	5.5	62.86	37.14	0.182134
Least Developed Countries	Gambia, The	2001	5.8	59.61	40.39	0.227929
Least Developed Countries	Gambia, The	2002	-3.25	60.97	39.03	0.213635
Least Developed Countries	Gambia, The	2003	6.87	62.41	37.59	0.206907
Least Developed Countries	Gambia, The	2004	7.05	61.25	38.75	0.213829
Least Developed Countries	Gambia, The	2005	-2.35173	61.71	38.29	0.213766
Least Developed Countries	Gambia, The	2006	-0.555581	60.21	39.79	0.22621
Least Developed Countries	Gambia, The	2007	3.04325	57.27	42.73	0.250023
Least Developed Countries	Gambia, The	2008	6.25591	56.28	43.72	0.254545
Least Developed Countries	Gambia, The	2009	6.66572	53.91	46.09	0.281564
Least Developed Countries	Gambia, The	2010	5.90834	56.6	43.4	0.245372
Least Developed Countries	Gambia, The	2011	-8.13044	56.24	43.76	0.243488
Least Developed Countries	Gambia, The	2012	5.24157	56.95	43.05	0.241467
Least Developed Countries	Gambia, The	2013	2.87277	59.33	40.67	0.224066
Least Developed Countries	Gambia, The	2014	-1.40738	53.17	46.83	0.256912
Least Developed Countries	Gambia, The	2015	4.05807	48.95	51.05	0.254092
Least Developed Countries	Gambia, The	2016	1.94336	48.62	51.38	0.246611
Least Developed Countries	Gambia, The	2017	4.82261	48.02	51.98	0.243913
Least Developed Countries	Gambia, The	2018	7.23489	49.01	50.99	0.241218
Least Developed Countries	Gambia, The	2019	6.22205	49.24	50.76	0.247051
Economies in Transition	Georgia	1990	-14.7882	12.774	87.226	6.97418
Economies in Transition	Georgia	1991	-21.1	14.1188	85.8812	5.27513
Economies in Transition	Georgia	1992	-44.9	18.5421	81.4579	4.11819
Economies in Transition	Georgia	1993	-29.3	26.0262	73.9738	3.27625
Economies in Transition	Georgia	1994	-10.4	22.7023	77.2977	2.15878
Economies in Transition	Georgia	1995	2.6	46.3947	53.6053	1.75622
Economies in Transition	Georgia	1996	11.2	42.754	57.246	1.41595
Economies in Transition	Georgia	1997	10.519	44.3638	55.6362	1.26899
Economies in Transition	Georgia	1998	3.1049	47.529	52.471	1.17589
Economies in Transition	Georgia	1999	2.86926	49.6631	50.3369	1.08727
Economies in Transition	Georgia	2000	1.83834	47.25	52.75	1.16994
Economies in Transition	Georgia	2001	4.80545	53.15	46.85	0.876849
Economies in Transition	Georgia	2002	5.47384	56.76	43.24	0.743996
Economies in Transition	Georgia	2003	11.0587	55.33	44.67	0.799649
Economies in Transition	Georgia	2004	5.7945	54.53	45.47	0.858087
Economies in Transition	Georgia	2005	9.58957	41.48	58.52	1.08649
Economies in Transition	Georgia	2006	9.41977	37.22	62.78	1.21123
Economies in Transition	Georgia	2007	12.579	36.22	63.78	1.45849
Economies in Transition	Georgia	2008	2.41857	36.3	63.7	1.25765
Economies in Transition	Georgia	2009	-3.65051	36.72	63.28	1.47336
Economies in Transition	Georgia	2010	6.24949	39.15	60.85	1.40492
Economies in Transition	Georgia	2011	7.4	31.53	68.47	1.73569
Economies in Transition	Georgia	2012	6.36901	28.69	71.31	1.9282
Economies in Transition	Georgia	2013	3.62131	33.16	66.84	2.10885
Economies in Transition	Georgia	2014	4.43192	31.34	68.66	2.27724
Economies in Transition	Georgia	2015	3.02221	28.15	71.85	2.46962
Economies in Transition	Georgia	2016	2.90644	27.64	72.36	2.58886
Economies in Transition	Georgia	2017	4.8426	28.03	71.97	2.60998
Economies in Transition	Georgia	2018	4.84292	27.94	72.06	2.56806
Economies in Transition	Georgia	2019	4.98235	25.22	74.78	2.71762
Developed Countries	Germany	1990	5.25501	2.09803	97.902	12.0266
Developed Countries	Germany	1991	5.10826	1.98863	98.0114	11.6549
Developed Countries	Germany	1992	1.92308	2.06262	97.9374	11.0738
Developed Countries	Germany	1993	-0.97685	2.11093	97.8891	10.9303
Developed Countries	Germany	1994	2.39189	2.2662	97.7338	10.7554
Developed Countries	Germany	1995	1.54415	2.31975	97.6803	10.7086
Developed Countries	Germany	1996	0.805823	2.25217	97.7478	11.04
Developed Countries	Germany	1997	1.79216	2.82442	97.1756	10.6376
Developed Countries	Germany	1998	2.01393	3.04512	96.9549	10.5458
Developed Countries	Germany	1999	1.88726	3.26371	96.7363	10.1533
Developed Countries	Germany	2000	2.9125	3.7	96.3	10.0993
Developed Countries	Germany	2001	1.68147	3.9	96.1	10.2936
Developed Countries	Germany	2002	-0.197974	4.41	95.59	10.103
Developed Countries	Germany	2003	-0.700117	5.44	94.56	10.1387
Developed Countries	Germany	2004	1.17509	6.34	93.66	9.9504
Developed Countries	Germany	2005	0.731707	7.28	92.72	9.72942
Developed Countries	Germany	2006	3.81644	8.59	91.41	9.88644
Developed Countries	Germany	2007	2.97646	10.47	89.53	9.52759
Developed Countries	Germany	2008	0.959879	10.25	89.75	9.61745
Developed Countries	Germany	2009	-5.69384	10.72	89.28	8.97179
Developed Countries	Germany	2010	4.17988	11.61	88.39	9.4534
Developed Countries	Germany	2011	3.92519	12.54	87.46	9.29904
Developed Countries	Germany	2012	0.418498	13.64	86.36	9.45132
Developed Countries	Germany	2013	0.437591	13.63	86.37	9.62421
Developed Countries	Germany	2014	2.20954	14.02	85.98	9.08851
Developed Countries	Germany	2015	1.49193	14.55	85.45	9.08729
Developed Countries	Germany	2016	2.23	14.24	85.76	9.07301
Developed Countries	Germany	2017	2.68023	15.22	84.78	8.85829
Developed Countries	Germany	2018	1.08602	16.12	83.88	8.5362
Developed Countries	Germany	2019	1.05551	17.17	82.83	7.91162
Developing Countries	Ghana	1990	3.32882	80.6264	19.3736	0.188855
Developing Countries	Ghana	1991	5.28183	82.9284	17.0716	0.16834
Developing Countries	Ghana	1992	3.87942	81.0012	18.9988	0.196763
Developing Countries	Ghana	1993	4.85	81.2973	18.7027	0.198054
Developing Countries	Ghana	1994	3.3	80.5576	19.4424	0.208916
Developing Countries	Ghana	1995	4.11242	79.7893	20.2107	0.218055
Developing Countries	Ghana	1996	4.60246	78.8292	21.1708	0.234216
Developing Countries	Ghana	1997	4.19636	78.339	21.661	0.240103
Developing Countries	Ghana	1998	4.70039	73.5781	26.4219	0.332295
Developing Countries	Ghana	1999	4.4	72.7839	27.2161	0.34977
Developing Countries	Ghana	2000	3.7	71.62	28.38	0.297736
Developing Countries	Ghana	2001	4	69.32	30.68	0.31432
Developing Countries	Ghana	2002	4.5	65.68	34.32	0.366979
Developing Countries	Ghana	2003	5.2	64.47	35.53	0.344091
Developing Countries	Ghana	2004	5.6	62.38	37.62	0.314023
Developing Countries	Ghana	2005	5.9	61.43	38.57	0.322719
Developing Countries	Ghana	2006	6.39991	58.56	41.44	0.380266
Developing Countries	Ghana	2007	4.34682	54.53	45.47	0.397144
Developing Countries	Ghana	2008	9.1498	57.34	42.66	0.367512
Developing Countries	Ghana	2009	4.84449	51.9	48.1	0.414134
Developing Countries	Ghana	2010	7.89971	51.91	48.09	0.451581
Developing Countries	Ghana	2011	14.0471	50.09	49.91	0.462822
Developing Countries	Ghana	2012	9.29279	46.5	53.5	0.562
Developing Countries	Ghana	2013	7.31253	46.19	53.81	0.587425
Developing Countries	Ghana	2014	2.85624	47.69	52.31	0.554281
Developing Countries	Ghana	2015	2.12076	44.02	55.98	0.566623
Developing Countries	Ghana	2016	3.37347	45.22	54.78	0.564217
Developing Countries	Ghana	2017	8.12889	44.43	55.57	0.584105
Developing Countries	Ghana	2018	6.20008	41.48	58.52	0.627538
Developing Countries	Ghana	2019	6.50777	41.8	58.2	0.658824
Developed Countries	Greece	1990	1.25994	7.80688	92.1931	7.41606
Developed Countries	Greece	1991	3.1	8.31686	91.6831	7.34695
Developed Countries	Greece	1992	0.7	7.89938	92.1006	7.51799
Developed Countries	Greece	1993	-1.6	7.99461	92.0054	7.46529
Developed Countries	Greece	1994	2	8.03728	91.9627	7.584
Developed Countries	Greece	1995	2.09972	8.31139	91.6886	7.84215
Developed Countries	Greece	1996	2.86213	8.20918	91.7908	7.80013
Developed Countries	Greece	1997	4.4842	7.83404	92.166	7.85648
Developed Countries	Greece	1998	3.89491	7.38037	92.6196	8.12741
Developed Countries	Greece	1999	3.0726	7.83406	92.1659	8.12139
Developed Countries	Greece	2000	3.91977	7.82	92.18	8.7416
Developed Countries	Greece	2001	4.13161	7.11	92.89	8.8942
Developed Countries	Greece	2002	3.92287	7.33	92.67	8.86074
Developed Countries	Greece	2003	5.79453	7.6	92.4	9.17088
Developed Countries	Greece	2004	5.06099	7.85	92.15	9.11353
Developed Countries	Greece	2005	0.599142	8.01	91.99	9.27888
Developed Countries	Greece	2006	5.65243	8.51	91.49	9.13763
Developed Countries	Greece	2007	3.27375	8.05	91.95	9.44112
Developed Countries	Greece	2008	-0.335173	8.32	91.68	9.06404
Developed Countries	Greece	2009	-4.30073	9.19	90.81	8.52974
Developed Countries	Greece	2010	-5.47863	11.37	88.63	7.87495
Developed Countries	Greece	2011	-10.1493	11.38	88.62	7.61376
Developed Countries	Greece	2012	-7.0867	14.17	85.83	7.25124
Developed Countries	Greece	2013	-2.516	16.61	83.39	6.61
Developed Countries	Greece	2014	0.475696	16.41	83.59	6.38518
Developed Countries	Greece	2015	-0.196088	17.47	82.53	6.28507
Developed Countries	Greece	2016	-0.487173	16.41	83.59	6.20362
Developed Countries	Greece	2017	1.09215	16.38	83.62	6.21125
Developed Countries	Greece	2018	1.66843	17.86	82.14	6.05802
Developed Countries	Greece	2019	1.8036	18.51	81.49	5.59619
Developing Countries	Grenada	1990	4.01261	8.34213	91.6579	1.14193
Developing Countries	Grenada	1991	1.38555	8.10645	91.8936	1.24401
Developing Countries	Grenada	1992	-0.851149	7.73763	92.2624	1.74967
Developing Countries	Grenada	1993	-1.95882	8.07469	91.9253	1.52697
Developing Countries	Grenada	1994	1.69356	7.43074	92.5693	1.61055
Developing Countries	Grenada	1995	2.12948	7.41831	92.5817	1.69515
Developing Countries	Grenada	1996	4.43823	6.14677	93.8532	1.88113
Developing Countries	Grenada	1997	5.01549	8.32581	91.6742	1.96914
Developing Countries	Grenada	1998	11.7535	10.1106	89.8894	2.15638
Developing Countries	Grenada	1999	6.89836	10.2956	89.7044	2.14783
Developing Countries	Grenada	2000	4.88795	10.5	89.5	2.04207
Developing Countries	Grenada	2001	-2.0239	10.42	89.58	2.22778
Developing Countries	Grenada	2002	3.43732	10.46	89.54	2.3158
Developing Countries	Grenada	2003	9.46397	10.44	89.56	2.40378
Developing Countries	Grenada	2004	-0.64745	10.56	89.44	2.20421
Developing Countries	Grenada	2005	13.2762	10.57	89.43	2.38873
Developing Countries	Grenada	2006	-3.99533	10.36	89.64	2.47765
Developing Countries	Grenada	2007	6.12345	9.9	90.1	2.66203
Developing Countries	Grenada	2008	0.947543	10.69	89.31	2.74994
Developing Countries	Grenada	2009	-6.61328	10.47	89.53	7.6569
Developing Countries	Grenada	2010	-0.511263	10.53	89.47	2.73
Developing Countries	Grenada	2011	0.764977	11.27	88.73	2.903
Developing Countries	Grenada	2012	-1.15514	11.38	88.62	3.81566
Developing Countries	Grenada	2013	2.35142	10.92	89.08	2.95825
Developing Countries	Grenada	2014	7.34408	11.26	88.74	2.29568
Developing Countries	Grenada	2015	6.44314	11.07	88.93	2.46344
Developing Countries	Grenada	2016	3.73965	11.4	88.6	2.53938
Developing Countries	Grenada	2017	4.43868	11.48	88.52	2.61558
Developing Countries	Grenada	2018	4.36144	10.69	89.31	2.87127
Developing Countries	Grenada	2019	0.675703	10.37	89.63	2.94638
Developing Countries	Guatemala	1990	3.10256	74.9653	25.0347	0.434249
Developing Countries	Guatemala	1991	3.65825	74.2552	25.7448	0.433482
Developing Countries	Guatemala	1992	4.83834	72.2855	27.7145	0.506074
Developing Countries	Guatemala	1993	3.92713	69.9234	30.0766	0.521928
Developing Countries	Guatemala	1994	4.03374	68.4905	31.5095	0.54097
Developing Countries	Guatemala	1995	4.94855	65.1428	34.8572	0.617297
Developing Countries	Guatemala	1996	2.95778	65.7254	34.2746	0.587457
Developing Countries	Guatemala	1997	4.36409	65.304	34.696	0.607136
Developing Countries	Guatemala	1998	4.99353	62.0397	37.9603	0.750483
Developing Countries	Guatemala	1999	3.84706	64.6055	35.3945	0.724953
Developing Countries	Guatemala	2000	3.60887	62.75	37.25	0.812786
Developing Countries	Guatemala	2001	2.33257	61.35	38.65	0.826344
Developing Countries	Guatemala	2002	3.83929	63.84	36.16	0.861904
Developing Countries	Guatemala	2003	2.56038	64.37	35.63	0.84895
Developing Countries	Guatemala	2004	3.13792	66.17	33.83	0.847651
Developing Countries	Guatemala	2005	3.27603	65.32	34.68	0.890465
Developing Countries	Guatemala	2006	5.3514	64.81	35.19	0.871847
Developing Countries	Guatemala	2007	6.33772	63.36	36.64	0.920827
Developing Countries	Guatemala	2008	3.29352	66.59	33.41	0.818091
Developing Countries	Guatemala	2009	0.476898	65.35	34.65	0.846417
Developing Countries	Guatemala	2010	2.88418	67.17	32.83	0.802262
Developing Countries	Guatemala	2011	4.16391	67.19	32.81	0.808456
Developing Countries	Guatemala	2012	2.97471	67.45	32.55	0.821949
Developing Countries	Guatemala	2013	3.69482	67.29	32.71	0.864133
Developing Countries	Guatemala	2014	4.44398	66.36	33.64	0.911388
Developing Countries	Guatemala	2015	4.09217	63.4	36.6	1.04963
Developing Countries	Guatemala	2016	2.6778	63.34	36.66	1.10503
Developing Countries	Guatemala	2017	3.07985	65.09	34.91	1.03
Developing Countries	Guatemala	2018	3.3221	64.12	35.88	1.1207
Developing Countries	Guatemala	2019	3.86686	62.92	37.08	1.16297
Least Developed Countries	Guinea	1990	4.32406	89.2971	10.7029	0.157424
Least Developed Countries	Guinea	1991	2.61342	89.4082	10.5918	0.156084
Least Developed Countries	Guinea	1992	3.27095	86.3309	13.6691	0.156342
Least Developed Countries	Guinea	1993	5.04414	86.1783	13.8217	0.156586
Least Developed Countries	Guinea	1994	3.9701	85.9498	14.0502	0.158167
Least Developed Countries	Guinea	1995	4.60767	89.9303	10.0697	0.159568
Least Developed Countries	Guinea	1996	4.46158	88.8363	11.1637	0.164796
Least Developed Countries	Guinea	1997	5.1816	85.3077	14.6923	0.168362
Least Developed Countries	Guinea	1998	3.64412	84.36	15.64	0.173011
Least Developed Countries	Guinea	1999	3.812	86.3169	13.6831	0.177535
Least Developed Countries	Guinea	2000	2.50306	85.52	14.48	0.180809
Least Developed Countries	Guinea	2001	3.65835	84.84	15.16	0.186525
Least Developed Countries	Guinea	2002	5.16461	84.27	15.73	0.189842
Least Developed Countries	Guinea	2003	1.2486	83.47	16.53	0.194217
Least Developed Countries	Guinea	2004	2.34012	83.19	16.81	0.198303
Least Developed Countries	Guinea	2005	2.99727	81.56	18.44	0.200887
Least Developed Countries	Guinea	2006	1.18961	81.06	18.94	0.204138
Least Developed Countries	Guinea	2007	6.81747	80.36	19.64	0.208023
Least Developed Countries	Guinea	2008	4.13301	80.15	19.85	0.206391
Least Developed Countries	Guinea	2009	-1.12264	79.25	20.75	0.212756
Least Developed Countries	Guinea	2010	4.81336	75.71	24.29	0.245286
Least Developed Countries	Guinea	2011	5.61211	74.75	25.25	0.251428
Least Developed Countries	Guinea	2012	5.91529	76.36	23.64	0.232819
Least Developed Countries	Guinea	2013	3.94568	78.53	21.47	0.200132
Least Developed Countries	Guinea	2014	3.69654	78.57	21.43	0.200879
Least Developed Countries	Guinea	2015	3.82592	76.23	23.77	0.222181
Least Developed Countries	Guinea	2016	10.8206	75.29	24.71	0.240236
Least Developed Countries	Guinea	2017	10.3	71.96	28.04	0.276776
Least Developed Countries	Guinea	2018	6.35849	69.88	30.12	0.302071
Least Developed Countries	Guinea	2019	5.61691	65.44	34.56	0.309289
Least Developed Countries	Guinea-Bissau	1990	6.1	88.5796	11.4204	0.174312
Least Developed Countries	Guinea-Bissau	1991	5.1	88.5725	11.4275	0.170422
Least Developed Countries	Guinea-Bissau	1992	1.1	88.5139	11.4861	0.17641
Least Developed Countries	Guinea-Bissau	1993	2.1	88.0375	11.9625	0.172509
Least Developed Countries	Guinea-Bissau	1994	3.2	88.5234	11.4766	0.168801
Least Developed Countries	Guinea-Bissau	1995	4.4	88.5511	11.4489	0.165312
Least Developed Countries	Guinea-Bissau	1996	11.6	89.4036	10.5964	0.16204
Least Developed Countries	Guinea-Bissau	1997	6.5	88.3634	11.6366	0.1766
Least Developed Countries	Guinea-Bissau	1998	-28.1	89.0192	10.9808	0.147266
Least Developed Countries	Guinea-Bissau	1999	1.02554	88.0584	11.9416	0.161409
Least Developed Countries	Guinea-Bissau	2000	5.42699	91.24	8.76	0.124864
Least Developed Countries	Guinea-Bissau	2001	2.18891	91.21	8.79	0.122239
Least Developed Countries	Guinea-Bissau	2002	-0.985178	91.04	8.96	0.119574
Least Developed Countries	Guinea-Bissau	2003	0.56851	89.05	10.95	0.148056
Least Developed Countries	Guinea-Bissau	2004	2.7614	88.55	11.45	0.152266
Least Developed Countries	Guinea-Bissau	2005	4.2661	88.53	11.47	0.156142
Least Developed Countries	Guinea-Bissau	2006	2.30936	88.29	11.71	0.1597
Least Developed Countries	Guinea-Bissau	2007	3.26296	87.9	12.1	0.162942
Least Developed Countries	Guinea-Bissau	2008	3.20357	88.42	11.58	0.152045
Least Developed Countries	Guinea-Bissau	2009	3.36897	87.89	12.11	0.154995
Least Developed Countries	Guinea-Bissau	2010	4.61097	87.81	12.19	0.157625
Least Developed Countries	Guinea-Bissau	2011	8.08478	87.87	12.13	0.153551
Least Developed Countries	Guinea-Bissau	2012	-1.71268	87.81	12.19	0.155765
Least Developed Countries	Guinea-Bissau	2013	3.2559	87.71	12.29	0.151675
Least Developed Countries	Guinea-Bissau	2014	0.964561	87.28	12.72	0.159534
Least Developed Countries	Guinea-Bissau	2015	6.13408	87.15	12.85	0.161178
Least Developed Countries	Guinea-Bissau	2016	6.26281	86.73	13.27	0.173919
Least Developed Countries	Guinea-Bissau	2017	5.91918	86.8	13.2	0.169571
Least Developed Countries	Guinea-Bissau	2018	1.28374	86.59	13.41	0.17073
Least Developed Countries	Guinea-Bissau	2019	4.5	86.24	13.76	0.171793
Developing Countries	Guyana	1990	-3.06748	42.2339	57.7661	1.57405
Developing Countries	Guyana	1991	6.05787	33.3055	66.6945	1.53128
Developing Countries	Guyana	1992	7.75789	42.4638	57.5362	1.4427
Developing Countries	Guyana	1993	8.17511	44.4255	55.5745	1.44535
Developing Countries	Guyana	1994	8.53242	39.7079	60.2921	1.85796
Developing Countries	Guyana	1995	5.03145	38.3814	61.6186	2.00973
Developing Countries	Guyana	1996	7.95552	38.6082	61.3918	2.07676
Developing Countries	Guyana	1997	6.18067	36.9339	63.0661	2.2692
Developing Countries	Guyana	1998	-1.6791	34.6521	65.3479	2.32164
Developing Countries	Guyana	1999	2.96015	35.7476	64.2524	2.321
Developing Countries	Guyana	2000	-1.3638	29.75	70.25	2.22306
Developing Countries	Guyana	2001	2.27952	30.41	69.59	2.20073
Developing Countries	Guyana	2002	1.13263	33.73	66.27	2.17511
Developing Countries	Guyana	2003	-0.632225	34.1	65.9	2.17408
Developing Countries	Guyana	2004	1.56335	35.05	64.95	2.2394
Developing Countries	Guyana	2005	-1.95096	34.13	65.87	1.9835
Developing Countries	Guyana	2006	5.12961	36.28	63.72	1.78204
Developing Countries	Guyana	2007	7.19124	32.63	67.37	2.1568
Developing Countries	Guyana	2008	1.606	32.03	67.97	2.14243
Developing Countries	Guyana	2009	3.87653	31.09	68.91	2.17997
Developing Countries	Guyana	2010	3.7782	30.29	69.71	2.34845
Developing Countries	Guyana	2011	5.33938	32.57	67.43	2.43342
Developing Countries	Guyana	2012	5.38362	28.41	71.59	2.64765
Developing Countries	Guyana	2013	3.6535	26.27	73.73	2.60773
Developing Countries	Guyana	2014	1.68603	24.02	75.98	2.69856
Developing Countries	Guyana	2015	0.687521	24.95	75.05	2.71033
Developing Countries	Guyana	2016	3.80792	21.41	78.59	3.21509
Developing Countries	Guyana	2017	3.73437	22.18	77.82	3.1862
Developing Countries	Guyana	2018	4.44101	16.81	83.19	3.32475
Developing Countries	Guyana	2019	5.35263	11.35	88.65	3.64089
Least Developed Countries	Haiti	1990	1.03812	81.1196	18.8804	0.144929
Least Developed Countries	Haiti	1991	1.88054	81.6924	18.3076	0.139303
Least Developed Countries	Haiti	1992	-5.30993	83.4271	16.5729	0.122959
Least Developed Countries	Haiti	1993	-5.4263	84.6097	15.3903	0.0924848
Least Developed Countries	Haiti	1994	-11.9506	95.0396	4.9604	0.0249924
Least Developed Countries	Haiti	1995	9.89771	81.3191	18.6809	0.116211
Least Developed Countries	Haiti	1996	4.14077	82.1802	17.8198	0.134393
Least Developed Countries	Haiti	1997	2.70471	80.5882	19.4118	0.158143
Least Developed Countries	Haiti	1998	2.18184	79.3002	20.6998	0.160251
Least Developed Countries	Haiti	1999	2.71025	77.0639	22.9361	0.165884
Least Developed Countries	Haiti	2000	0.870059	80.85	19.15	0.173681
Least Developed Countries	Haiti	2001	-0.342748	80.88	19.12	0.185856
Least Developed Countries	Haiti	2002	1.05182	79.08	20.92	0.209044
Least Developed Countries	Haiti	2003	3.48078	79.02	20.98	0.203368
Least Developed Countries	Haiti	2004	-1.31786	81.11	18.89	0.18459
Least Developed Countries	Haiti	2005	3.07217	81.11	18.89	0.184877
Least Developed Countries	Haiti	2006	1.76875	81.37	18.63	0.18406
Least Developed Countries	Haiti	2007	4.70653	79.26	20.74	0.215895
Least Developed Countries	Haiti	2008	2.65803	79.64	20.36	0.210437
Least Developed Countries	Haiti	2009	5.89038	80.33	19.67	0.203102
Least Developed Countries	Haiti	2010	-5.65151	78.99	21.01	0.247253
Least Developed Countries	Haiti	2011	5.09821	79.01	20.99	0.267318
Least Developed Countries	Haiti	2012	0.502424	82.19	17.81	0.236076
Least Developed Countries	Haiti	2013	4.32478	80.39	19.61	0.254791
Least Developed Countries	Haiti	2014	1.72257	77.77	22.23	0.286283
Least Developed Countries	Haiti	2015	2.56251	76.12	23.88	0.30667
Least Developed Countries	Haiti	2016	1.81247	76.13	23.87	0.309964
Least Developed Countries	Haiti	2017	2.51027	76.17	23.83	0.303213
Least Developed Countries	Haiti	2018	1.66781	76.25	23.75	0.295779
Least Developed Countries	Haiti	2019	-1.6846	76.4	23.6	0.294768
Developing Countries	Honduras	1990	2.79175	70.1291	29.8709	0.49442
Developing Countries	Honduras	1991	-3.31931	70.2019	29.7981	0.480525
Developing Countries	Honduras	1992	6.07369	67.7491	32.2509	0.520528
Developing Countries	Honduras	1993	6.49572	66.725	33.275	0.537593
Developing Countries	Honduras	1994	0.211903	63.9469	36.0531	0.585694
Developing Countries	Honduras	1995	6.1893	62.9697	37.0303	0.677876
Developing Countries	Honduras	1996	1.87078	62.6306	37.3694	0.663851
Developing Countries	Honduras	1997	4.59808	65.3815	34.6185	0.668243
Developing Countries	Honduras	1998	3.59023	62.873	37.127	0.752363
Developing Countries	Honduras	1999	-0.735651	53.7641	46.2359	0.742519
Developing Countries	Honduras	2000	7.29129	55.24	44.76	0.758992
Developing Countries	Honduras	2001	2.72319	50.4	49.6	0.859016
Developing Countries	Honduras	2002	3.75434	49.76	50.24	0.878881
Developing Countries	Honduras	2003	4.54704	47.94	52.06	0.947044
Developing Countries	Honduras	2004	6.2323	46.7	53.3	1.03804
Developing Countries	Honduras	2005	6.0506	51.62	48.38	0.934444
Developing Countries	Honduras	2006	6.56724	52.49	47.51	1.04397
Developing Countries	Honduras	2007	6.18833	50.87	49.13	1.09368
Developing Countries	Honduras	2008	4.2316	50.32	49.68	1.07631
Developing Countries	Honduras	2009	-2.43163	51.33	48.67	0.990089
Developing Countries	Honduras	2010	3.73114	52.16	47.84	0.983473
Developing Countries	Honduras	2011	3.83569	51.92	48.08	1.03883
Developing Countries	Honduras	2012	4.12869	52.27	47.73	1.06936
Developing Countries	Honduras	2013	2.79156	51.07	48.93	1.06495
Developing Countries	Honduras	2014	3.05808	53.63	46.37	1.05632
Developing Countries	Honduras	2015	3.84008	52.68	47.32	1.08966
Developing Countries	Honduras	2016	3.89297	52.77	47.23	1.02149
Developing Countries	Honduras	2017	4.84291	45.92	54.08	0.982075
Developing Countries	Honduras	2018	3.84499	49.76	50.24	1.04824
Developing Countries	Honduras	2019	2.65307	45.96	54.04	1.04862
Developed Countries	Hungary	1990	0.19443	3.85667	96.1433	6.49895
Developed Countries	Hungary	1991	0.17576	4.27666	95.7233	6.22265
Developed Countries	Hungary	1992	-3.06418	4.8861	95.1139	5.59341
Developed Countries	Hungary	1993	-0.576109	5.04624	94.9538	5.63648
Developed Countries	Hungary	1994	2.94715	5.10692	94.8931	5.5862
Developed Countries	Hungary	1995	1.48953	5.4176	94.5824	5.56009
Developed Countries	Hungary	1996	0.08241	5.14334	94.8567	5.66857
Developed Countries	Hungary	1997	3.14313	5.23053	94.7695	5.53813
Developed Countries	Hungary	1998	3.9	5.18875	94.8113	5.58609
Developed Countries	Hungary	1999	3.07103	5.15847	94.8415	5.65664
Developed Countries	Hungary	2000	4.47919	5.17	94.83	5.35013
Developed Countries	Hungary	2001	4.07409	5.12	94.88	5.52438
Developed Countries	Hungary	2002	4.74128	5.17	94.83	5.47319
Developed Countries	Hungary	2003	4.08452	5.01	94.99	5.74458
Developed Countries	Hungary	2004	5.00045	4.63	95.37	5.57526
Developed Countries	Hungary	2005	4.29528	7.29	92.71	5.54373
Developed Countries	Hungary	2006	3.94777	7.86	92.14	5.5067
Developed Countries	Hungary	2007	0.276981	9	91	5.35513
Developed Countries	Hungary	2008	1.00646	8.96	91.04	5.28083
Developed Countries	Hungary	2009	-6.59547	12.29	87.71	4.77319
Developed Countries	Hungary	2010	1.08312	13.46	86.54	4.78799
Developed Countries	Hungary	2011	1.86016	14.74	85.26	4.7043
Developed Countries	Hungary	2012	-1.25775	16.47	83.53	4.37786
Developed Countries	Hungary	2013	1.80636	17.18	82.82	4.12005
Developed Countries	Hungary	2014	4.22373	15.72	84.28	4.11799
Developed Countries	Hungary	2015	3.70326	15.6	84.4	4.40718
Developed Countries	Hungary	2016	2.19196	15.34	84.66	4.50885
Developed Countries	Hungary	2017	4.26856	14.54	85.46	4.7446
Developed Countries	Hungary	2018	5.3595	13.58	86.42	4.74653
Developed Countries	Hungary	2019	4.55406	13.64	86.36	4.74663
Developing Countries	India	1990	5.53345	58.6529	41.3471	0.645362
Developing Countries	India	1991	1.05683	57.6048	42.3952	0.681306
Developing Countries	India	1992	5.4824	57.2306	42.7694	0.688755
Developing Countries	India	1993	4.75078	56.9834	43.0166	0.702337
Developing Countries	India	1994	6.65892	55.5572	44.4428	0.725358
Developing Countries	India	1995	7.57449	54.4841	45.5159	0.765476
Developing Countries	India	1996	7.54952	53.7674	46.2326	0.787966
Developing Countries	India	1997	4.04982	52.4881	47.5119	0.818533
Developing Countries	India	1998	6.18442	52.7123	47.2877	0.820288
Developing Countries	India	1999	8.84576	51.7173	48.2827	0.868285
Developing Countries	India	2000	3.84099	46.88	53.12	0.887641
Developing Countries	India	2001	4.82397	47.11	52.89	0.887014
Developing Countries	India	2002	3.80398	45.75	54.25	0.90134
Developing Countries	India	2003	7.86038	45.63	54.37	0.910255
Developing Countries	India	2004	7.92294	44.92	55.08	0.96109
Developing Countries	India	2005	7.92343	44.16	55.84	0.990293
Developing Countries	India	2006	8.06073	43.16	56.84	1.04266
Developing Countries	India	2007	7.66082	41.53	58.47	1.12976
Developing Countries	India	2008	3.0867	39.37	60.63	1.18632
Developing Countries	India	2009	7.86189	37.41	62.59	1.28508
Developing Countries	India	2010	8.49758	36.16	63.84	1.3449
Developing Countries	India	2011	5.24132	35.01	64.99	1.40507
Developing Countries	India	2012	5.45639	34.75	65.25	1.50851
Developing Countries	India	2013	6.38611	34.85	65.15	1.53995
Developing Countries	India	2014	7.41023	33.85	66.15	1.65723
Developing Countries	India	2015	7.99625	33.4	66.6	1.64715
Developing Countries	India	2016	8.25631	33.02	66.98	1.6574
Developing Countries	India	2017	6.79538	32.41	67.59	1.73336
Developing Countries	India	2018	6.45385	32.82	67.18	1.8127
Developing Countries	India	2019	3.73792	32.93	67.07	1.79762
Developing Countries	Indonesia	1990	7.22433	58.5975	41.4025	0.818738
Developing Countries	Indonesia	1991	6.77582	57.8287	42.1713	0.879779
Developing Countries	Indonesia	1992	6.49751	56.8208	43.1792	0.913552
Developing Countries	Indonesia	1993	6.49641	55.433	44.567	0.969813
Developing Countries	Indonesia	1994	7.53997	52.8138	47.1862	1.02714
Developing Countries	Indonesia	1995	8.22001	50.0982	49.9018	1.13581
Developing Countries	Indonesia	1996	7.81819	48.7504	51.2496	1.18418
Developing Countries	Indonesia	1997	4.69988	47.0874	52.9126	1.2876
Developing Countries	Indonesia	1998	-13.1267	48.2996	51.7004	1.27695
Developing Countries	Indonesia	1999	0.791126	45.0787	54.9213	1.33969
Developing Countries	Indonesia	2000	4.92007	45.62	54.38	1.32686
Developing Countries	Indonesia	2001	3.64347	44.33	55.67	1.40868
Developing Countries	Indonesia	2002	4.49948	44.66	55.34	1.40616
Developing Countries	Indonesia	2003	4.78037	43	57	1.51555
Developing Countries	Indonesia	2004	5.03087	41.46	58.54	1.52827
Developing Countries	Indonesia	2005	5.69257	41.57	58.43	1.512
Developing Countries	Indonesia	2006	5.50095	40.07	59.93	1.58936
Developing Countries	Indonesia	2007	6.34502	40.01	59.99	1.63512
Developing Countries	Indonesia	2008	6.0137	41.12	58.88	1.5974
Developing Countries	Indonesia	2009	4.62887	38.18	61.82	1.63892
Developing Countries	Indonesia	2010	6.22385	34.81	65.19	1.7182
Developing Countries	Indonesia	2011	6.16978	30.92	69.08	1.93912
Developing Countries	Indonesia	2012	6.03005	28.78	71.22	1.93804
Developing Countries	Indonesia	2013	5.55726	29.7	70.3	1.77891
Developing Countries	Indonesia	2014	5.00667	28.32	71.68	1.89673
Developing Countries	Indonesia	2015	4.87632	26.69	73.31	1.8908
Developing Countries	Indonesia	2016	5.03307	28.24	71.76	1.84476
Developing Countries	Indonesia	2017	5.06979	26.15	73.85	1.95473
Developing Countries	Indonesia	2018	5.17429	21.05	78.95	2.1556
Developing Countries	Indonesia	2019	5.01929	19.09	80.91	2.2904
Developing Countries	Iran, Islamic Rep.	1990	13.5949	1.23836	98.7616	3.52108
Developing Countries	Iran, Islamic Rep.	1991	12.7161	1.22692	98.7731	3.79861
Developing Countries	Iran, Islamic Rep.	1992	3.29798	1.44947	98.5505	3.97497
Developing Countries	Iran, Islamic Rep.	1993	-1.47101	1.52815	98.4719	3.96375
Developing Countries	Iran, Islamic Rep.	1994	-1.69829	1.08697	98.913	4.40151
Developing Countries	Iran, Islamic Rep.	1995	2.40104	1.01809	98.9819	4.41908
Developing Countries	Iran, Islamic Rep.	1996	6.35053	1.03227	98.9677	4.4917
Developing Countries	Iran, Islamic Rep.	1997	1.3504	0.898424	99.1016	4.63125
Developing Countries	Iran, Islamic Rep.	1998	2.08001	0.841575	99.1584	4.54872
Developing Countries	Iran, Islamic Rep.	1999	2.0027	0.585859	99.4141	4.99006
Developing Countries	Iran, Islamic Rep.	2000	5.84553	0.44	99.56	5.18794
Developing Countries	Iran, Islamic Rep.	2001	2.39217	0.52	99.48	5.32844
Developing Countries	Iran, Islamic Rep.	2002	8.07883	0.67	99.33	5.49708
Developing Countries	Iran, Islamic Rep.	2003	8.6393	0.83	99.17	5.72157
Developing Countries	Iran, Islamic Rep.	2004	4.33667	0.74	99.26	6.05732
Developing Countries	Iran, Islamic Rep.	2005	3.1898	1.4	98.6	6.4618
Developing Countries	Iran, Islamic Rep.	2006	4.9998	1.4	98.6	6.86247
Developing Countries	Iran, Islamic Rep.	2007	8.15577	1.3	98.7	7.20725
Developing Countries	Iran, Islamic Rep.	2008	0.250857	0.7	99.3	7.25243
Developing Countries	Iran, Islamic Rep.	2009	1.00739	0.78	99.22	7.43629
Developing Countries	Iran, Islamic Rep.	2010	5.79794	0.9	99.1	7.33665
Developing Countries	Iran, Islamic Rep.	2011	2.64572	0.92	99.08	7.39667
Developing Countries	Iran, Islamic Rep.	2012	-3.74717	0.93	99.07	7.40165
Developing Countries	Iran, Islamic Rep.	2013	-1.52198	0.99	99.01	7.63186
Developing Countries	Iran, Islamic Rep.	2014	4.98478	0.93	99.07	7.81442
Developing Countries	Iran, Islamic Rep.	2015	-1.42488	0.91	99.09	7.63362
Developing Countries	Iran, Islamic Rep.	2016	8.81509	1.04	98.96	7.63172
Developing Countries	Iran, Islamic Rep.	2017	2.75851	0.98	99.02	7.76484
Developing Countries	Iran, Islamic Rep.	2018	-2.25386	1	99	7.79252
Developing Countries	Iran, Islamic Rep.	2019	-1.3402	0.98	99.02	7.59836
Developing Countries	Iraq	1990	57.8178	1.59633	98.4037	3.68618
Developing Countries	Iraq	1991	-64.0471	0.746342	99.2537	2.54619
Developing Countries	Iraq	1992	32.5922	0.490535	99.5095	3.65924
Developing Countries	Iraq	1993	30.2898	0.38934	99.6107	4.72485
Developing Countries	Iraq	1994	3.85453	0.357379	99.6426	5.22638
Developing Countries	Iraq	1995	2.12002	0.373227	99.6268	4.96642
Developing Countries	Iraq	1996	11.0208	0.350158	99.6498	4.75772
Developing Countries	Iraq	1997	21.2379	0.362383	99.6376	5.54628
Developing Countries	Iraq	1998	34.8571	0.39014	99.6099	4.15025
Developing Countries	Iraq	1999	17.5823	0.384234	99.6158	3.18875
Developing Countries	Iraq	2000	16.9217	0.36	99.64	3.72932
Developing Countries	Iraq	2001	1.76148	0.35	99.65	4.02963
Developing Countries	Iraq	2002	-8.19847	0.31	99.69	3.65636
Developing Countries	Iraq	2003	-36.6582	0.35	99.65	3.16949
Developing Countries	Iraq	2004	53.3818	0.36	99.64	3.34843
Developing Countries	Iraq	2005	1.67189	2.43	97.57	3.16207
Developing Countries	Iraq	2006	5.6463	2.56	97.44	3.02243
Developing Countries	Iraq	2007	1.88557	2	98	2.74621
Developing Countries	Iraq	2008	8.22811	1.15	98.85	3.10508
Developing Countries	Iraq	2009	3.3793	1.21	98.79	3.25129
Developing Countries	Iraq	2010	6.40256	1.67	98.33	3.64972
Developing Countries	Iraq	2011	7.54647	1.14	98.86	3.67905
Developing Countries	Iraq	2012	13.9364	1.3	98.7	4.04515
Developing Countries	Iraq	2013	7.62857	1.46	98.54	4.19519
Developing Countries	Iraq	2014	0.197017	1	99	3.89516
Developing Countries	Iraq	2015	4.72286	0.82	99.18	3.74365
Developing Countries	Iraq	2016	13.7874	0.94	99.06	3.88494
Developing Countries	Iraq	2017	-1.81975	0.57	99.43	4.12965
Developing Countries	Iraq	2018	2.63385	0.49	99.51	4.24498
Developing Countries	Iraq	2019	5.51379	0.43	99.57	4.44062
Developed Countries	Ireland	1990	8.46653	2.27978	97.7202	8.81054
Developed Countries	Ireland	1991	1.92964	2.22918	97.7708	8.90433
Developed Countries	Ireland	1992	3.34327	2.15873	97.8413	8.85503
Developed Countries	Ireland	1993	2.69261	2.10705	97.893	8.85003
Developed Countries	Ireland	1994	5.75583	2.17558	97.8244	9.14108
Developed Countries	Ireland	1995	9.63442	1.92244	98.0776	9.2689
Developed Countries	Ireland	1996	7.37323	1.93475	98.0652	9.57248
Developed Countries	Ireland	1997	11.0149	1.90074	98.0993	9.78996
Developed Countries	Ireland	1998	8.7572	2.27773	97.7223	10.3483
Developed Countries	Ireland	1999	10.5225	2.05685	97.9432	10.6451
Developed Countries	Ireland	2000	9.39942	2.04	97.96	11.1769
Developed Countries	Ireland	2001	5.30448	1.97	98.03	11.5926
Developed Countries	Ireland	2002	5.89623	2.25	97.75	11.1726
Developed Countries	Ireland	2003	3.00958	2.01	97.99	11.0321
Developed Countries	Ireland	2004	6.78587	2.31	97.69	10.9796
Developed Countries	Ireland	2005	5.73621	2.89	97.11	11.2142
Developed Countries	Ireland	2006	4.9805	3.23	96.77	11.0586
Developed Countries	Ireland	2007	5.30547	3.57	96.43	10.5389
Developed Countries	Ireland	2008	-4.4866	4.21	95.79	10.197
[truncated: 2,561 more rows]
